# Supplementary material for: On the edge of the steric repulsion and reactivity of bulky anilines; a case study of chloro(imino)phosphine synthesis
Source: Royal Society of Chemistry journal article supplement (doi:10.1039/d1dt02445k), 2021-01-01
Supplement: d1dt02445k1.pdf [file d1dt02445k1.pdf]

## **On the edge of the steric repulsion and reactivity of bulky anilines; a case study of a chloro(imino)phosphine synthesis**

Jan Vrána\*, Maksim A. Samsonov, Vlastimil Němec and Aleš Růžička

## Table of Contents

|                                                                                                                                                  |     |
|--------------------------------------------------------------------------------------------------------------------------------------------------|-----|
| Materials and Methods.....                                                                                                                       | S3  |
| Characterization of prepared compounds.....                                                                                                      | S4  |
| Deprotonation of Ar <sup>*</sup> -NH <sub>2</sub> .....                                                                                          | S4  |
| Spectroscopic characterization of Ar <sup>*</sup> -N(SiMe <sub>3</sub> ) <sub>2</sub> ( <b>1</b> ).....                                          | S6  |
| Spectroscopic characterization of Ar <sup>*</sup> -N(CH <sub>2</sub> Ph) <sub>2</sub> ( <b>2</b> ).....                                          | S7  |
| Spectroscopic characterization of Ar <sup>*</sup> -NCO ( <b>3</b> ).....                                                                         | S8  |
| Spectroscopic characterization of Ar <sup>*</sup> -N(CO) <sub>2</sub> C <sub>6</sub> H <sub>4</sub> ( <b>4</b> ).....                            | S9  |
| Spectroscopic characterization of Ar <sup>*</sup> -N=CHPh ( <b>5</b> ).....                                                                      | S10 |
| Spectroscopic characterization of Ar <sup>*</sup> -N=C(CH <sub>3</sub> )Ph ( <b>6</b> ).....                                                     | S11 |
| Spectroscopic characterization of Ar <sup>Bn</sup> -N(H)CH(Bu)Ph ( <b>7</b> ).....                                                               | S12 |
| Spectroscopic characterization of Ar <sup>Bn</sup> -NH <sub>2</sub> ( <b>8</b> ).....                                                            | S13 |
| Spectroscopic characterization of [ClP(μ-N-Ar <sup>*</sup> )] <sub>2</sub> ( <b>9</b> ), mixture of isomers <i>trans</i> - and <i>cis</i> -..... | S14 |
| Spectroscopic characterization of Ar <sup>Bn</sup> -N=PCl ( <b>10</b> ).....                                                                     | S16 |
| Crystallographic section .....                                                                                                                   | S18 |
| Quantum-Chemical Section .....                                                                                                                   | S27 |
| References.....                                                                                                                                  | S31 |

## Materials and Methods

### Elemental analysis

Elemental analyses were performed on an LECO-CHNS-932 analyzer.

### NMR spectroscopy

$^1\text{H}$  and  $^{13}\text{C}$  NMR spectra were recorded on Bruker Avance 500 MHz spectrometer or Bruker Ultrashield 400 MHz, using 5 mm tuneable broad-band probe. Appropriate chemical shifts in  $^1\text{H}$  and  $^{13}\text{C}$  NMR spectra were related to the residual signals of the solvent ( $\text{C}_6\text{D}_6$ :  $\delta(^1\text{H}) = 7.16$  ppm and  $\delta(^{13}\text{C}) = 128.39$  ppm).

## Characterization of prepared compounds

### Deprotonation of Ar\*-NH<sub>2</sub>

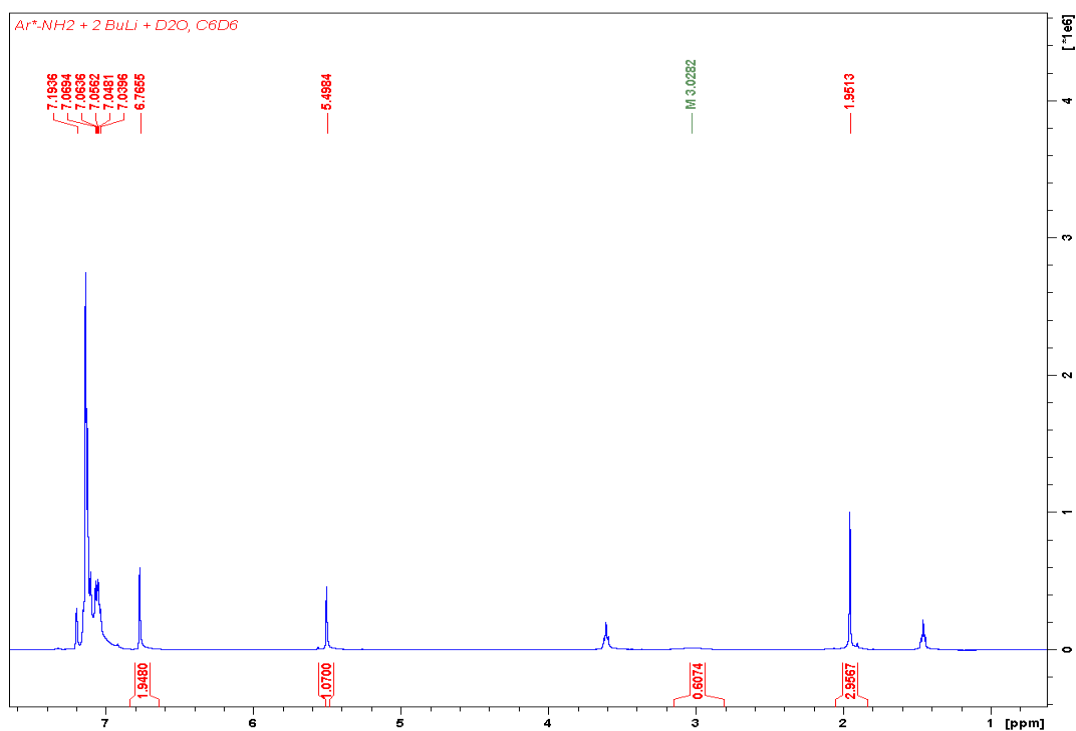

Figure S1. <sup>1</sup>H NMR spectrum of the deuterated Ar\*-NH<sub>2</sub>.

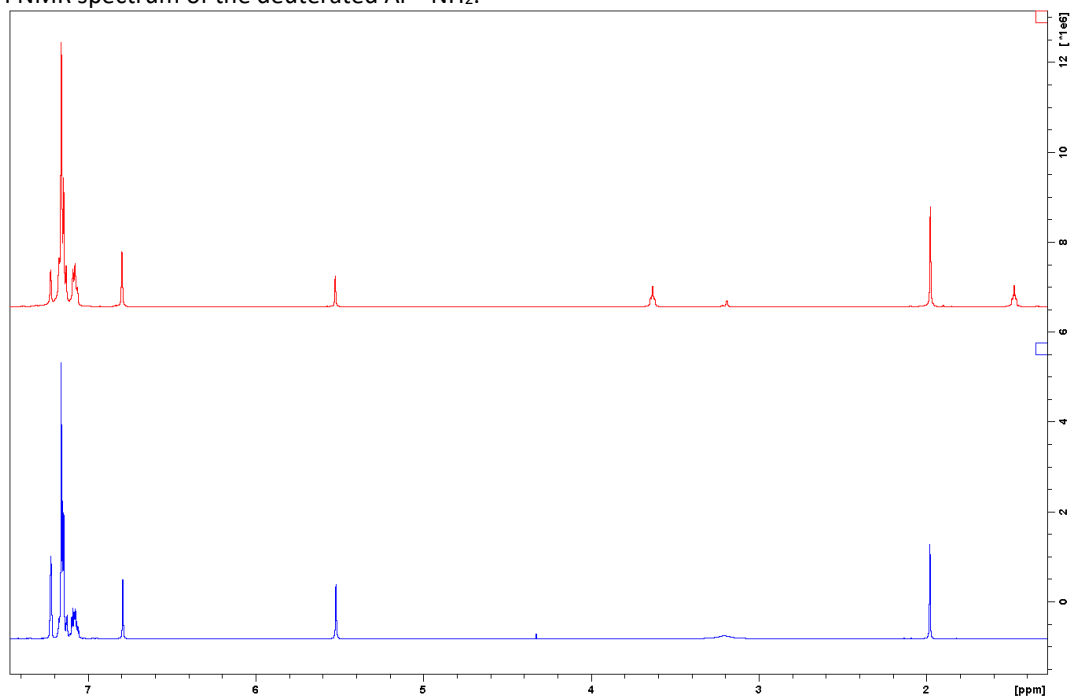

Figure S2. <sup>1</sup>H NMR spectrum of the parent (bellow) and deuterated (above) Ar\*-NH<sub>2</sub>.

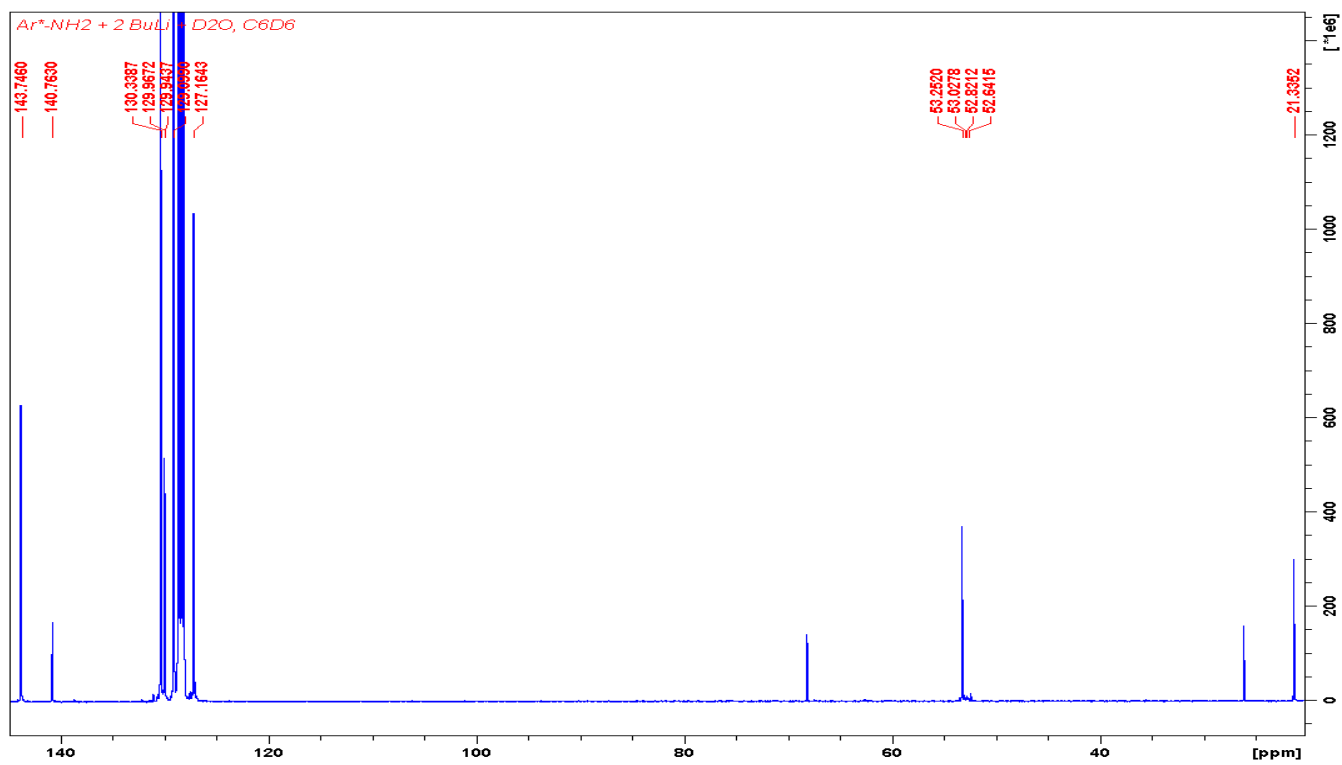

Figure S3. <sup>13</sup>C NMR spectrum of the deuterated Ar\*-NH<sub>2</sub>.

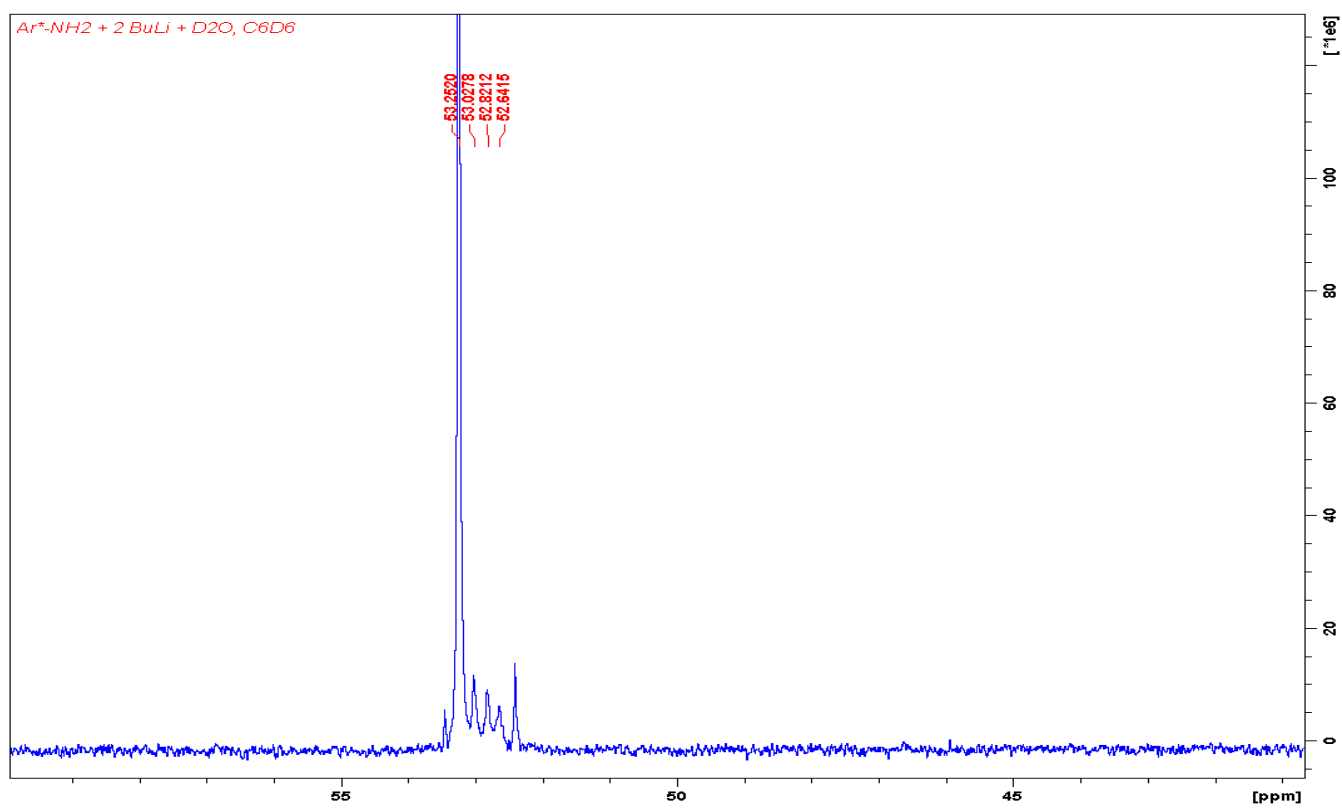

Figure S4. <sup>13</sup>C NMR spectrum of the deuterated Ar\*-NH<sub>2</sub>.

### Spectroscopic characterization of Ar\*-N(SiMe<sub>3</sub>)<sub>2</sub> (1)

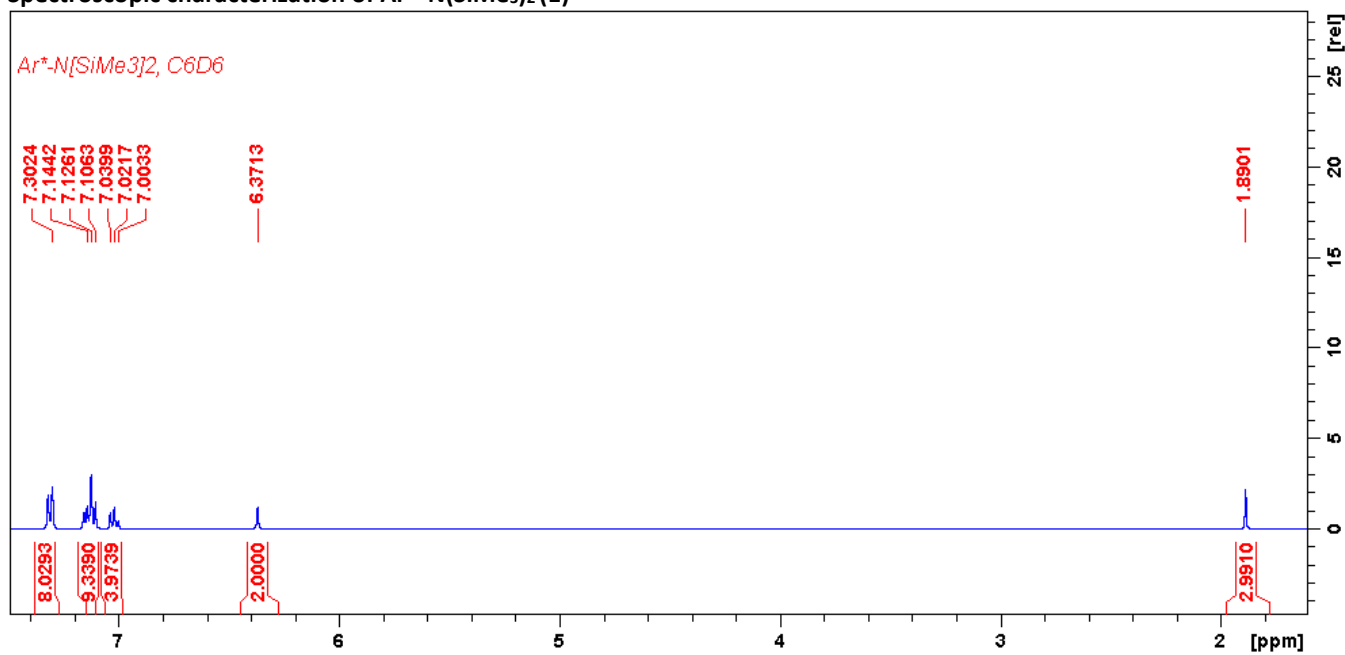

Figure S5. <sup>1</sup>H NMR spectrum of Ar\*-N(SiMe<sub>3</sub>)<sub>2</sub>.

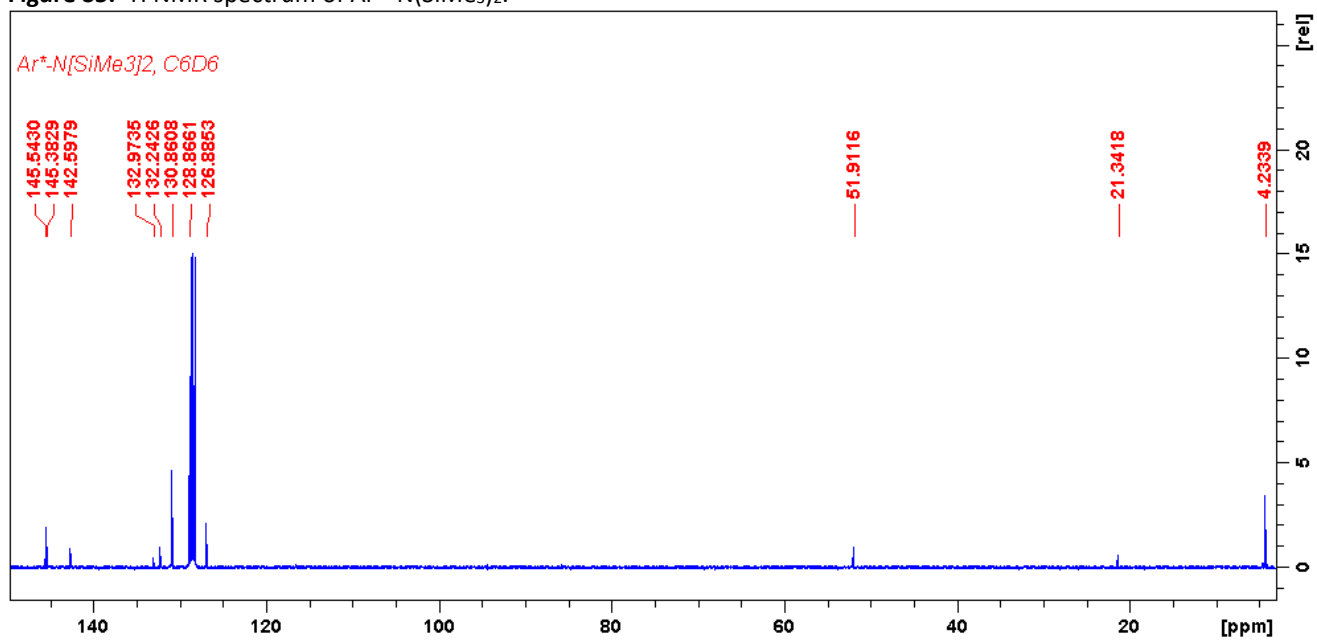

Figure S6. <sup>13</sup>C{<sup>1</sup>H} NMR spectrum of Ar\*-N(SiMe<sub>3</sub>)<sub>2</sub>.

Spectroscopic characterization of Ar\*-N(CH<sub>2</sub>Ph)<sub>2</sub> (2)

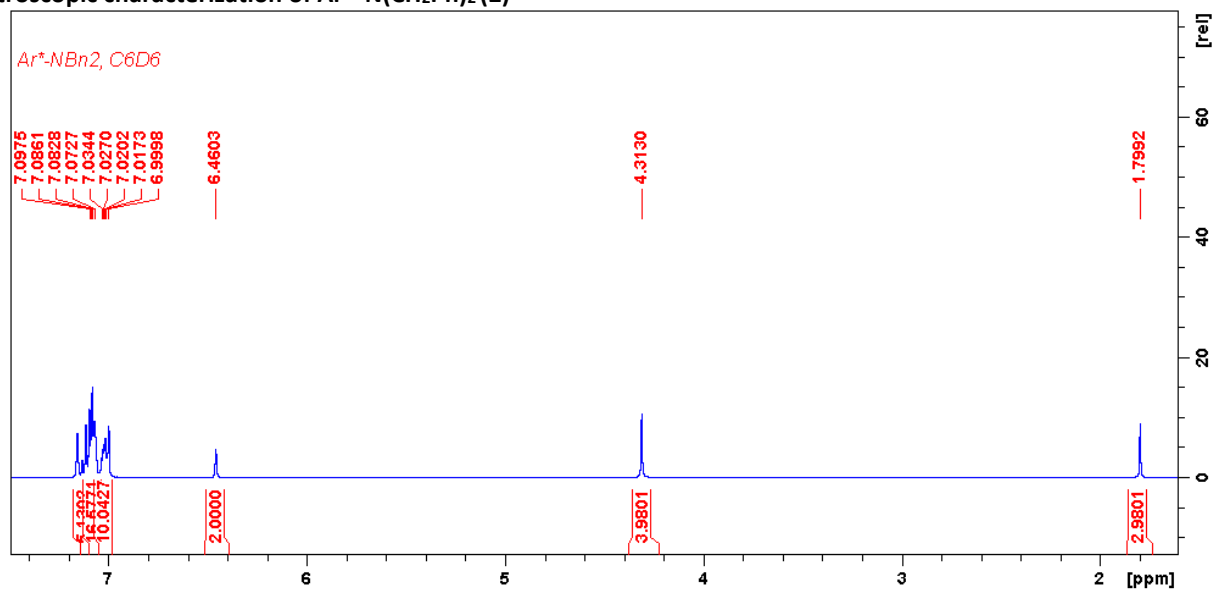

Figure S7. <sup>1</sup>H NMR spectrum of Ar\*-N(CH<sub>2</sub>Ph)<sub>2</sub>.

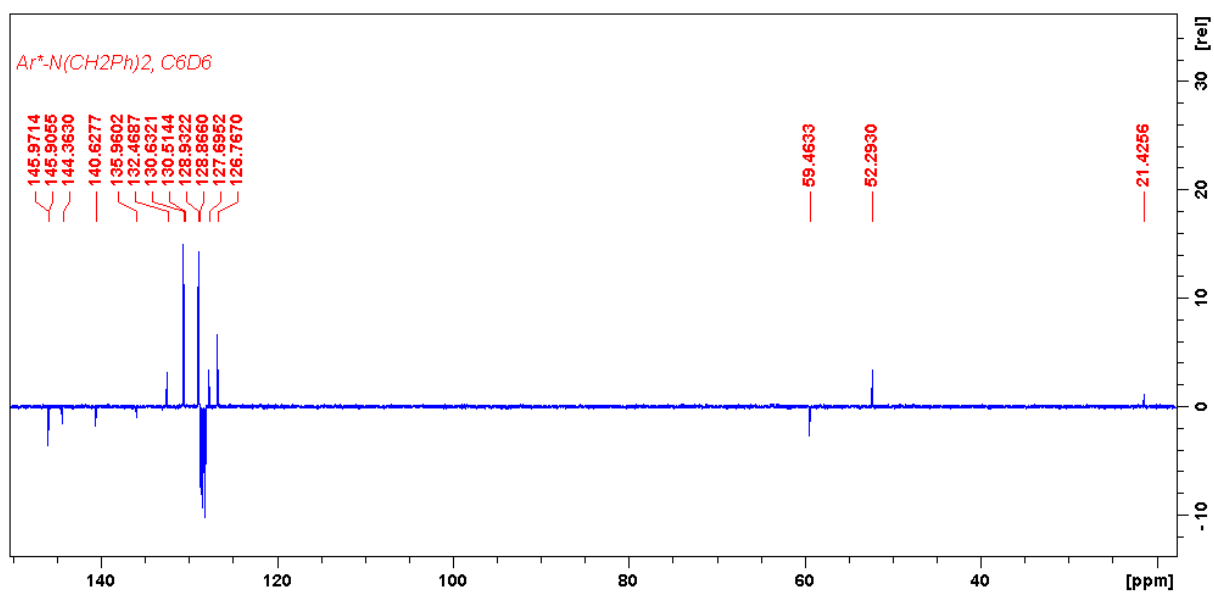

Figure S8. <sup>13</sup>C{<sup>1</sup>H} APT NMR spectrum of Ar\*-N(CH<sub>2</sub>Ph)<sub>2</sub>.

### Spectroscopic characterization of Ar\*-NCO (3)

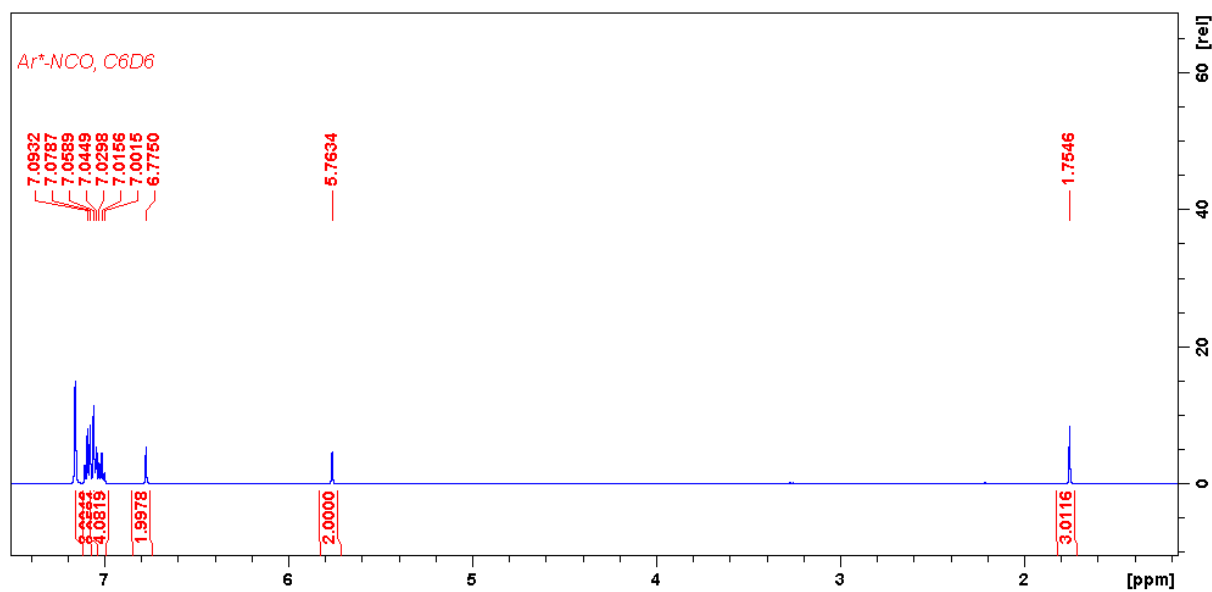

Figure S9.  $^1\text{H}$  NMR spectrum of Ar\*-NCO.

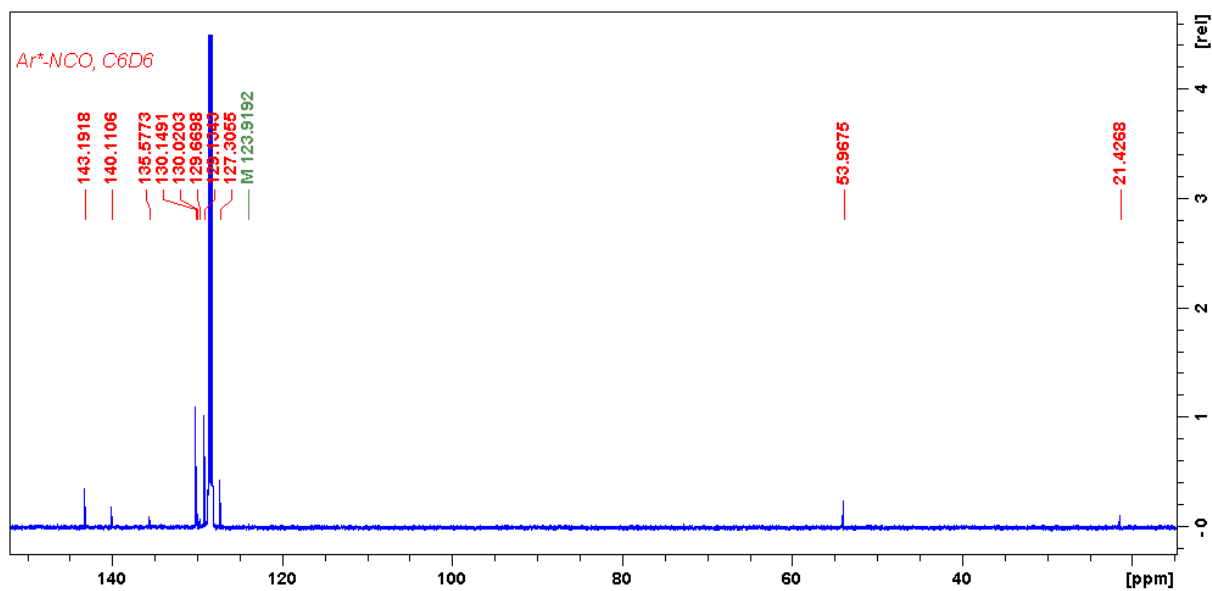

Figure S10.  $^{13}\text{C}\{^1\text{H}\}$  NMR spectrum of Ar\*-NCO.



### Spectroscopic characterization of Ar\*-N(CO)<sub>2</sub>C<sub>6</sub>H<sub>4</sub> (4)

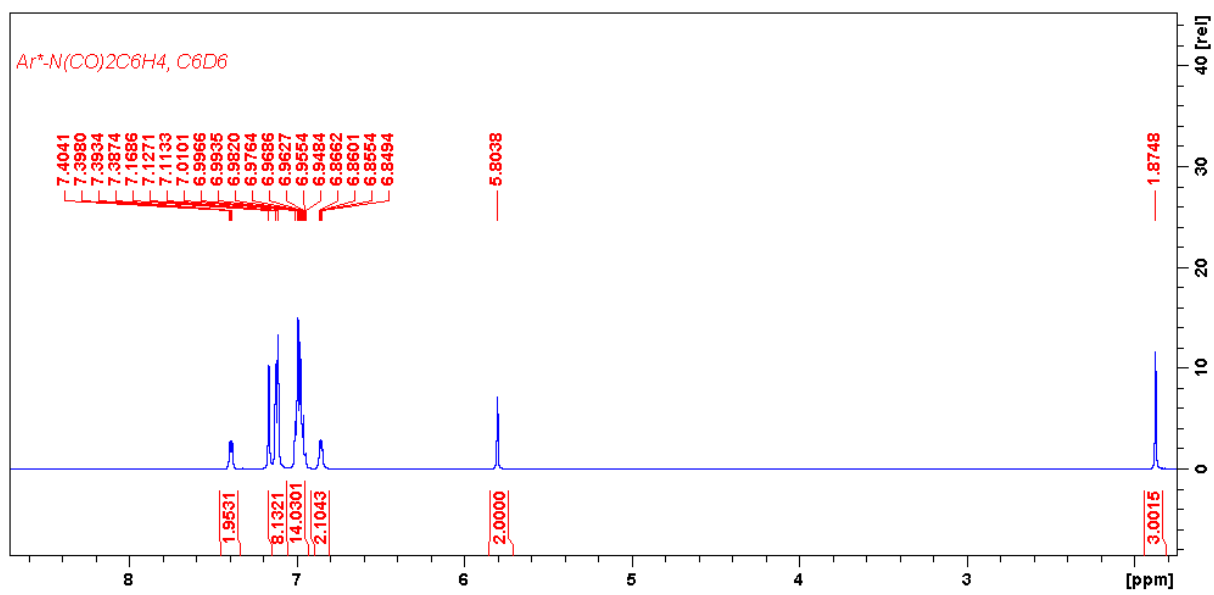

Figure S11. <sup>1</sup>H NMR spectrum of Ar\*-N(CO)<sub>2</sub>C<sub>6</sub>H<sub>4</sub>.

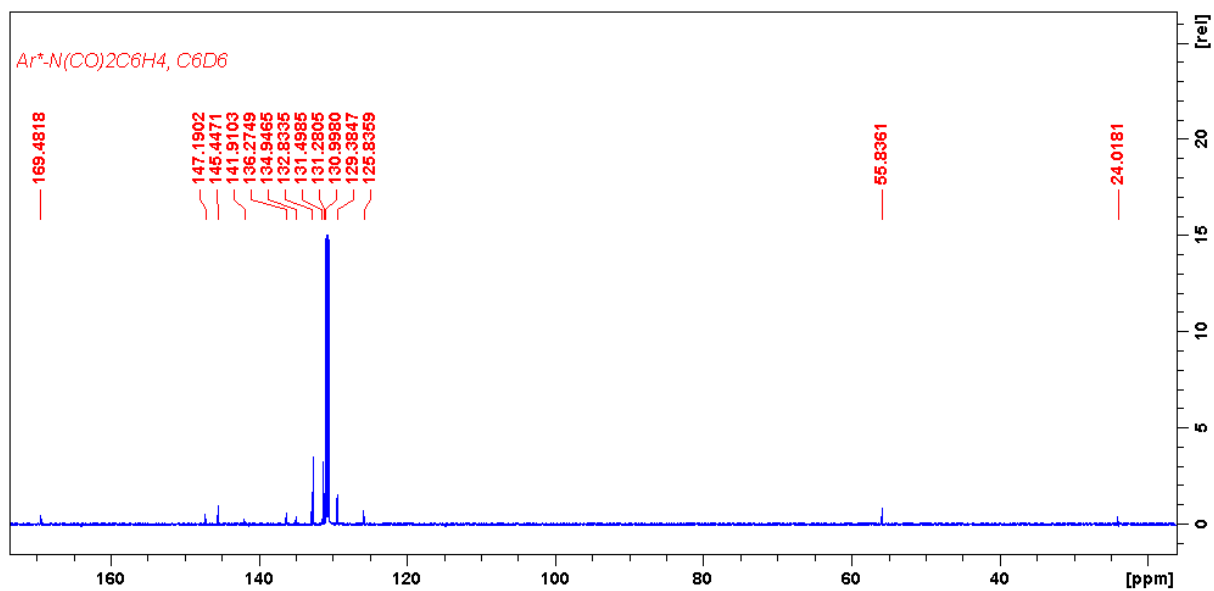

Figure S12. <sup>13</sup>C{<sup>1</sup>H} NMR spectrum of Ar\*-N(CO)<sub>2</sub>C<sub>6</sub>H<sub>4</sub>.

### Spectroscopic characterization of Ar\*-N=CHPh (5)

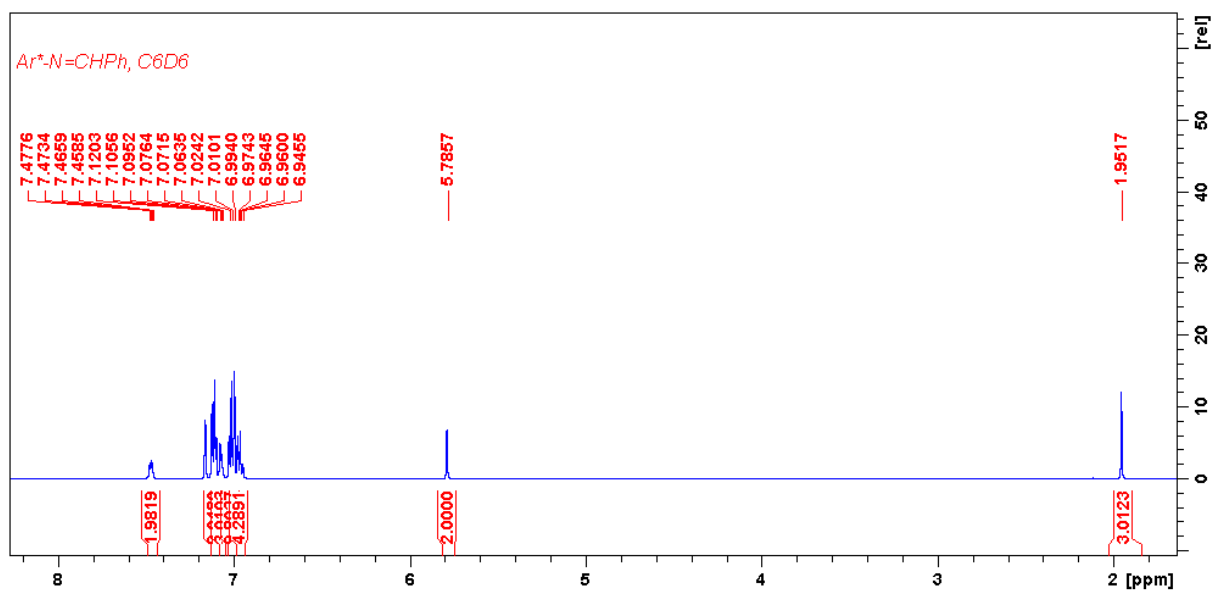

Figure S13.  $^1\text{H}$  NMR spectrum of Ar\*-N=CHPh.

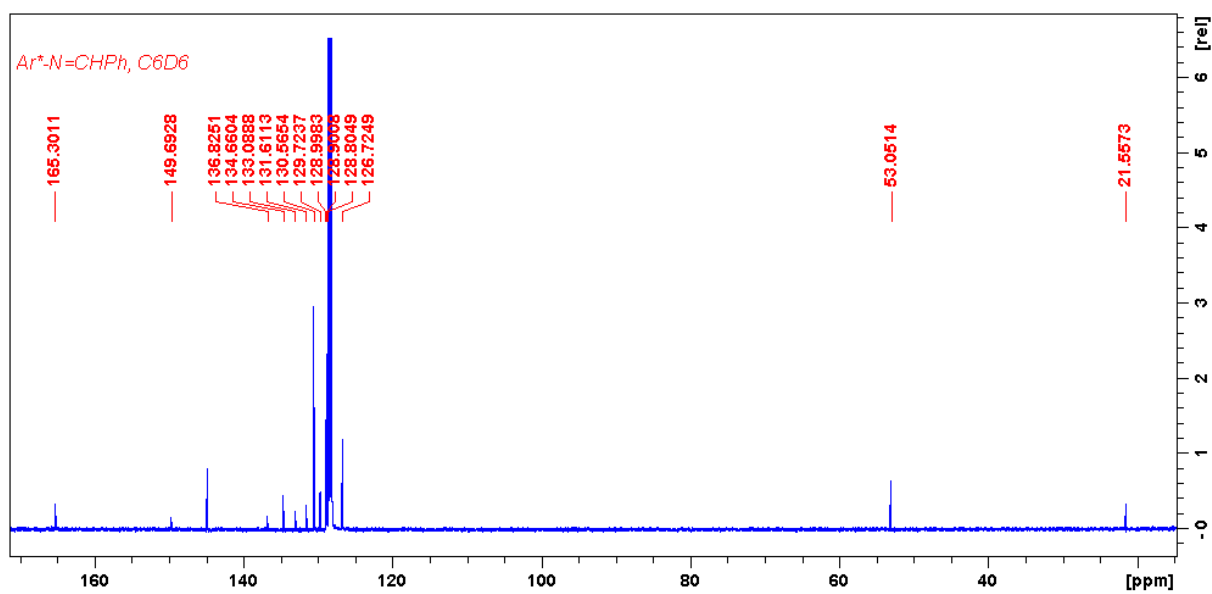

Figure S14.  $^{13}\text{C}\{^1\text{H}\}$  NMR spectrum of Ar\*-N=CHPh.

Spectroscopic characterization of Ar\*-N=C(CH<sub>3</sub>)Ph (6)

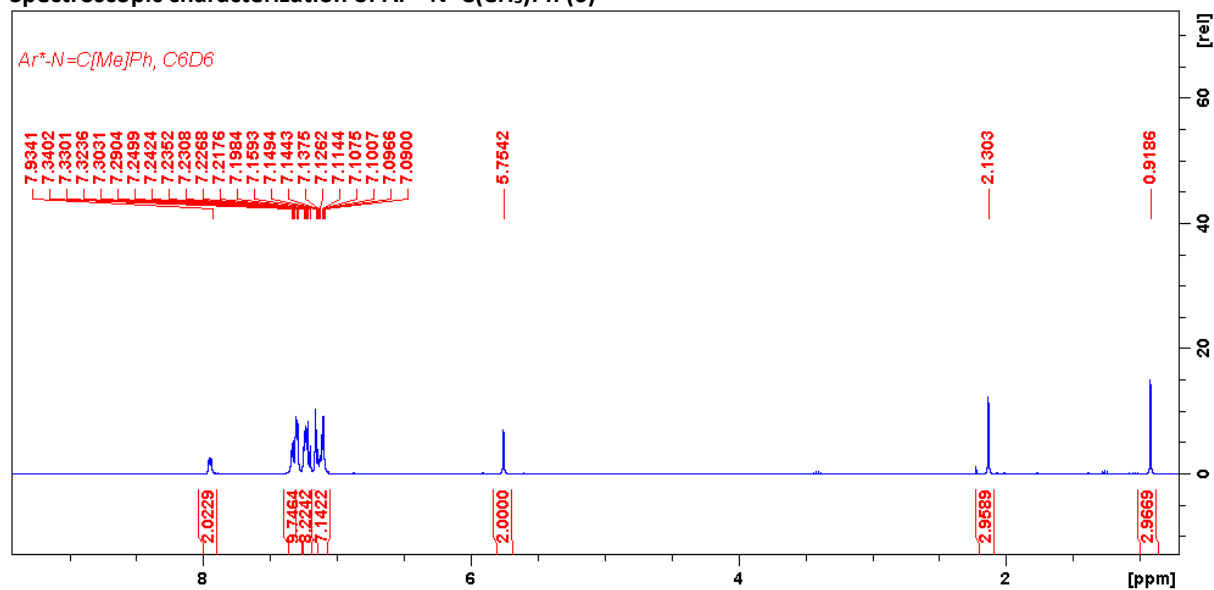

Figure S15. <sup>1</sup>H NMR spectrum of Ar\*-N=C(CH<sub>3</sub>)Ph.

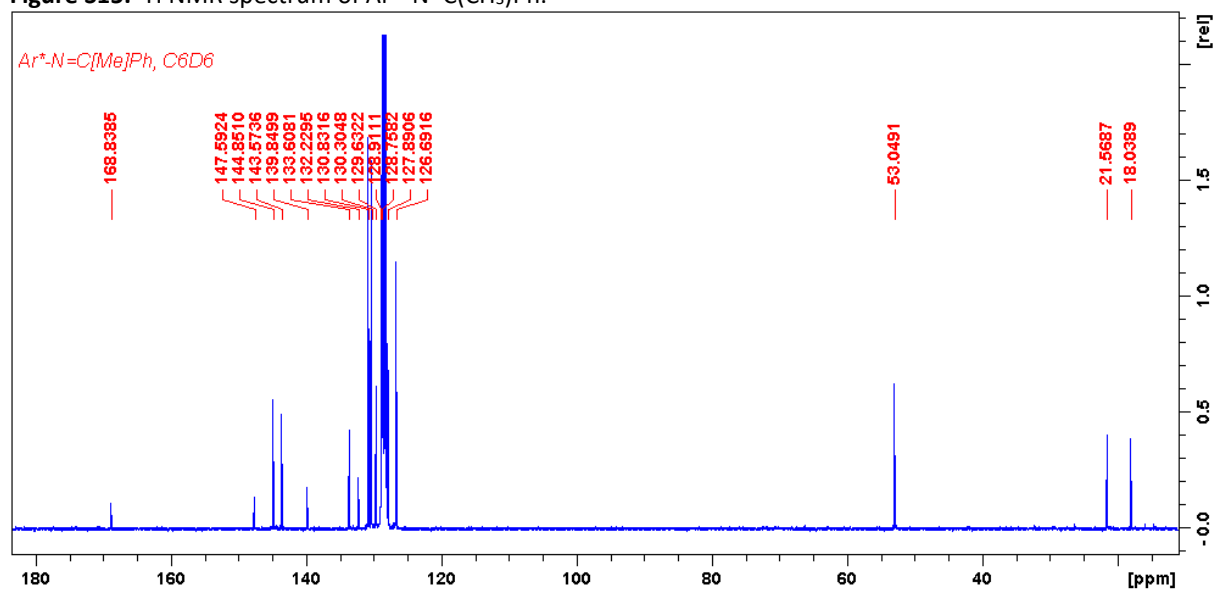

Figure S16. <sup>13</sup>C{<sup>1</sup>H} NMR spectrum of Ar\*-N=C(CH<sub>3</sub>)Ph.

Spectroscopic characterization of Ar<sup>Bn</sup>-N(H)CH(Bu)Ph (7)

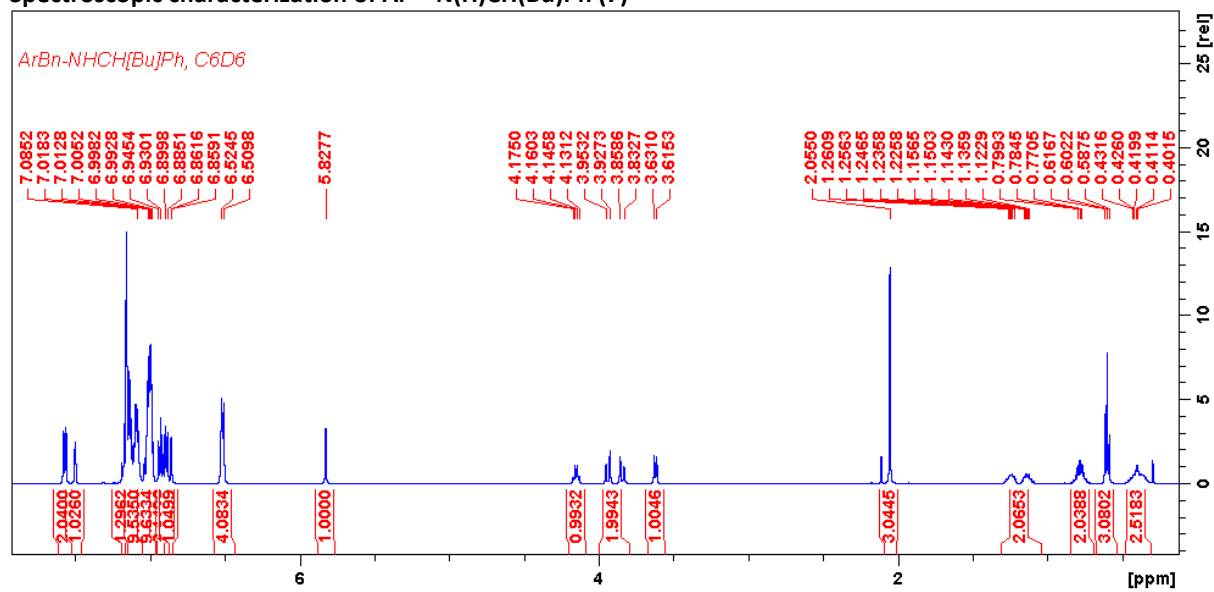

Figure S17. <sup>1</sup>H NMR spectrum of Ar<sup>Bn</sup>-N(H)CH(Bu)Ph.

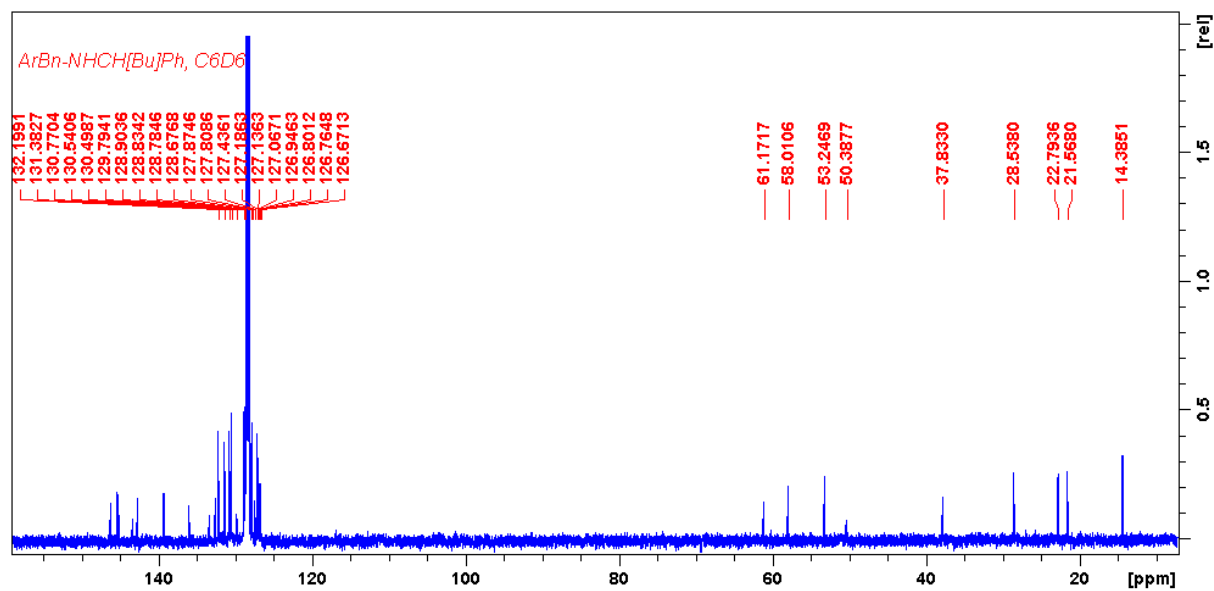

Figure S18. <sup>13</sup>C{<sup>1</sup>H} NMR spectrum of Ar<sup>Bn</sup>-N(H)CH(Bu)Ph.

Spectroscopic characterization of Ar<sup>Bn</sup>-NH<sub>2</sub> (8)

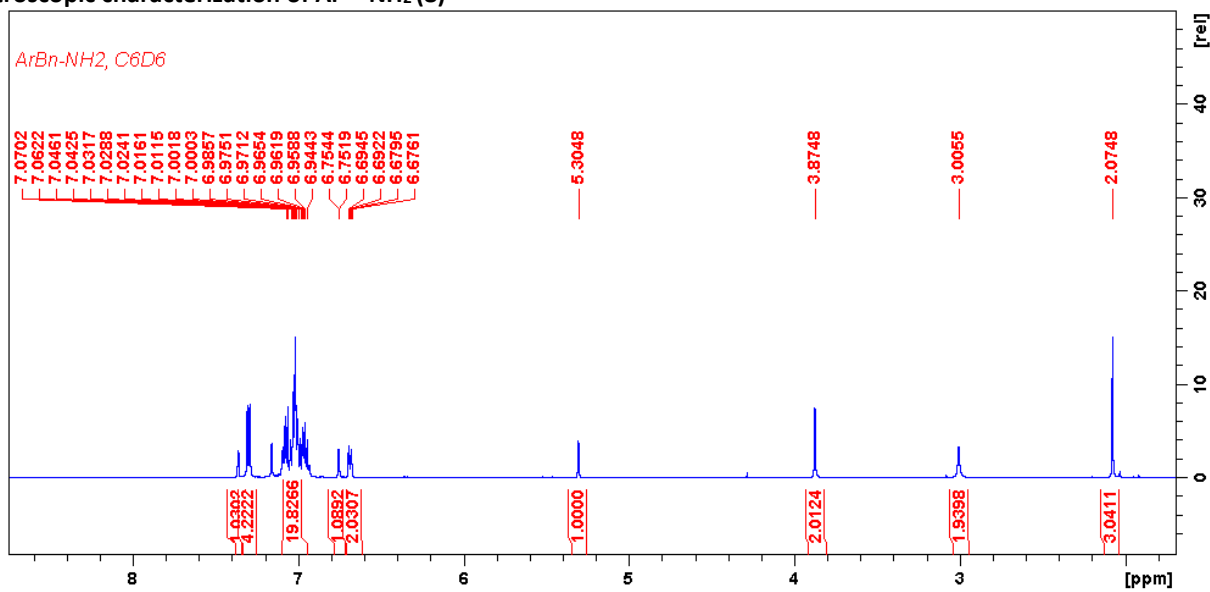

Figure S19. <sup>1</sup>H NMR spectrum of Ar<sup>Bn</sup>-NH<sub>2</sub>.

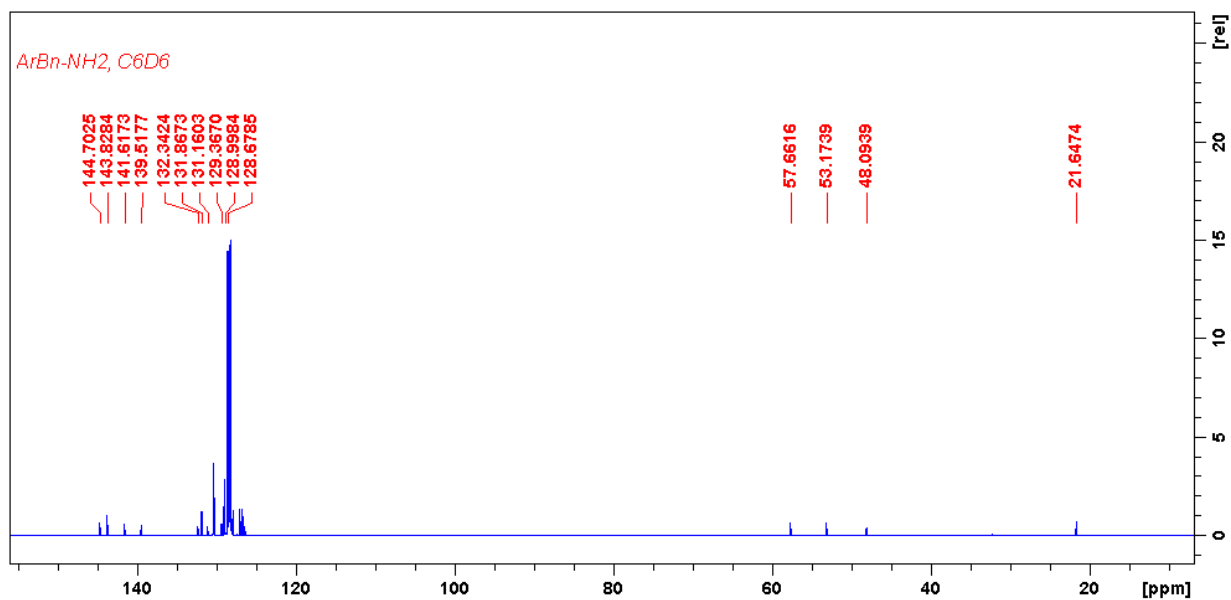

Figure S20. <sup>13</sup>C{<sup>1</sup>H} NMR spectrum of Ar<sup>Bn</sup>-NH<sub>2</sub>.

Spectroscopic characterization of  $[\text{CIP}(\mu\text{-N-Ar}^*)]_2$  (9)

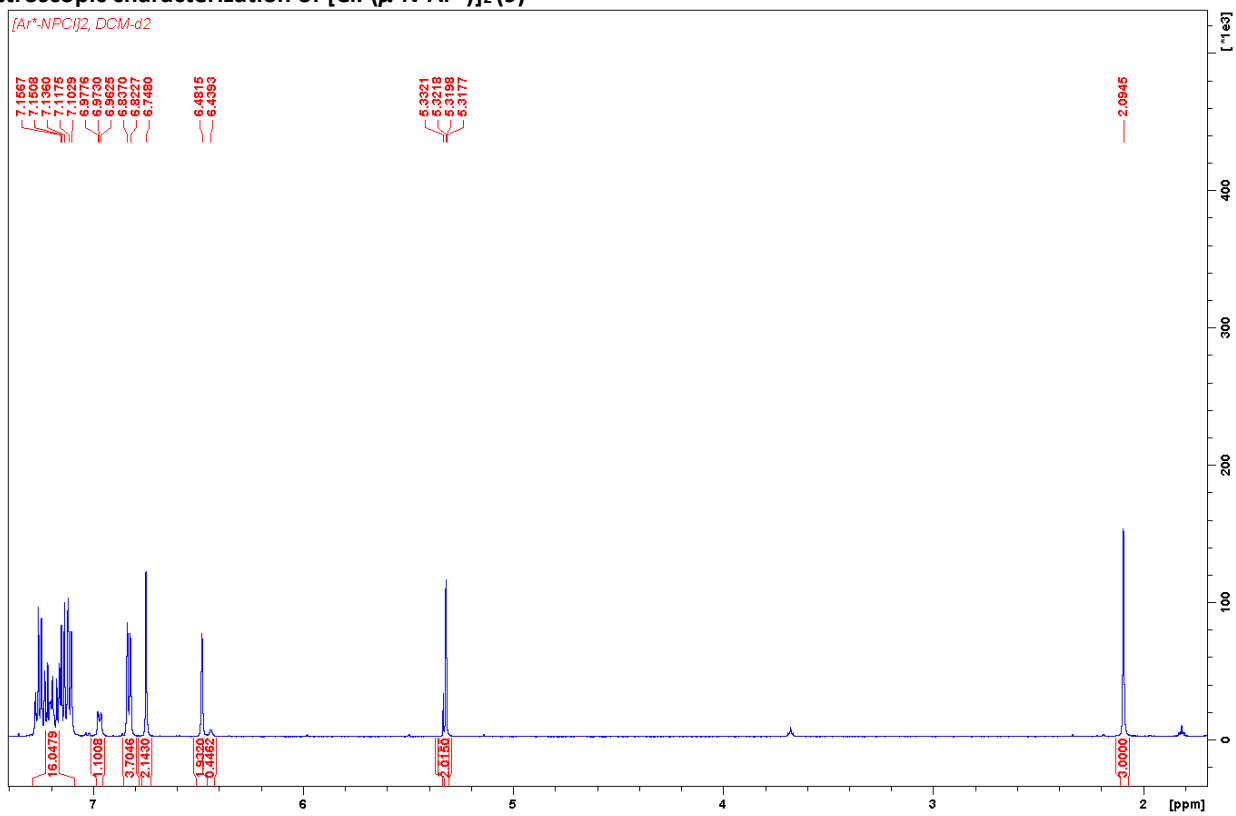

Figure S21.  $^1\text{H}$  NMR spectrum of  $[\text{CIP}(\mu\text{-N-Ar}^*)]_2$ .

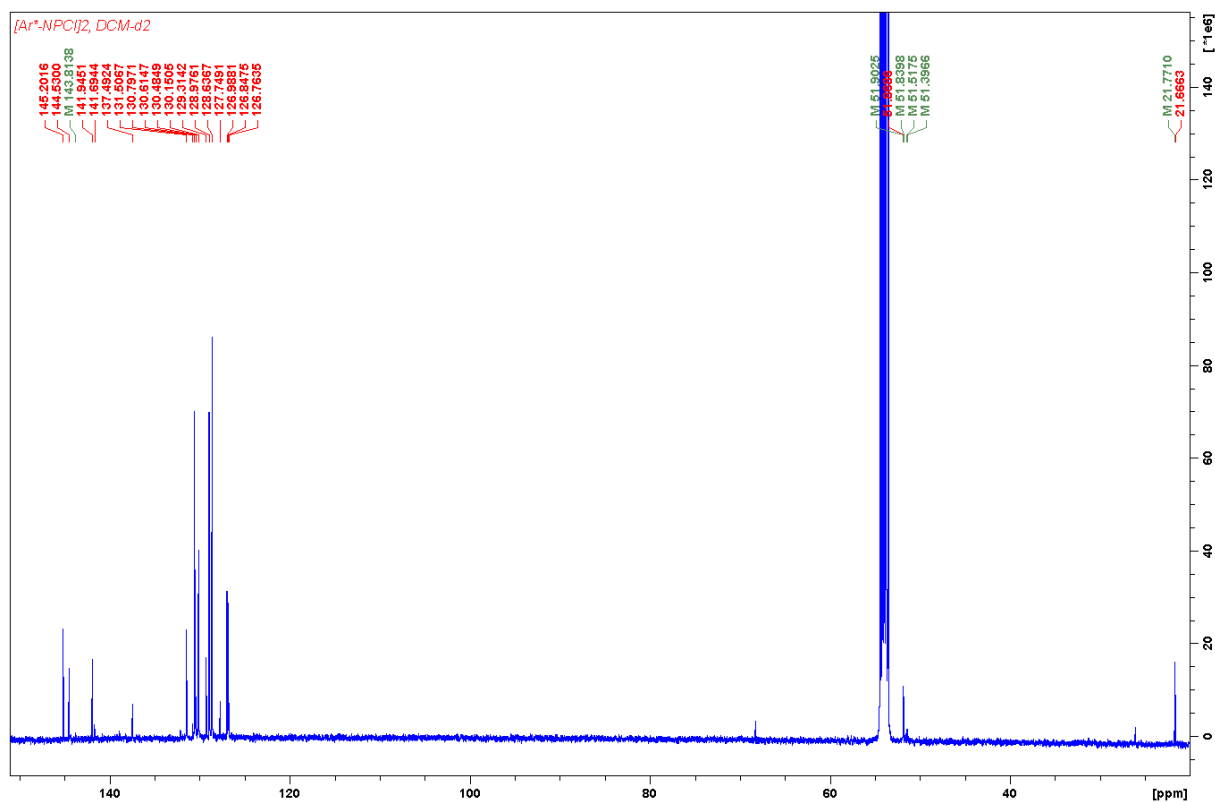

Figure S22.  $^{13}\text{C}\{^1\text{H}\}$  NMR spectrum of  $[\text{CIP}(\mu\text{-N-Ar}^*)]_2$ .

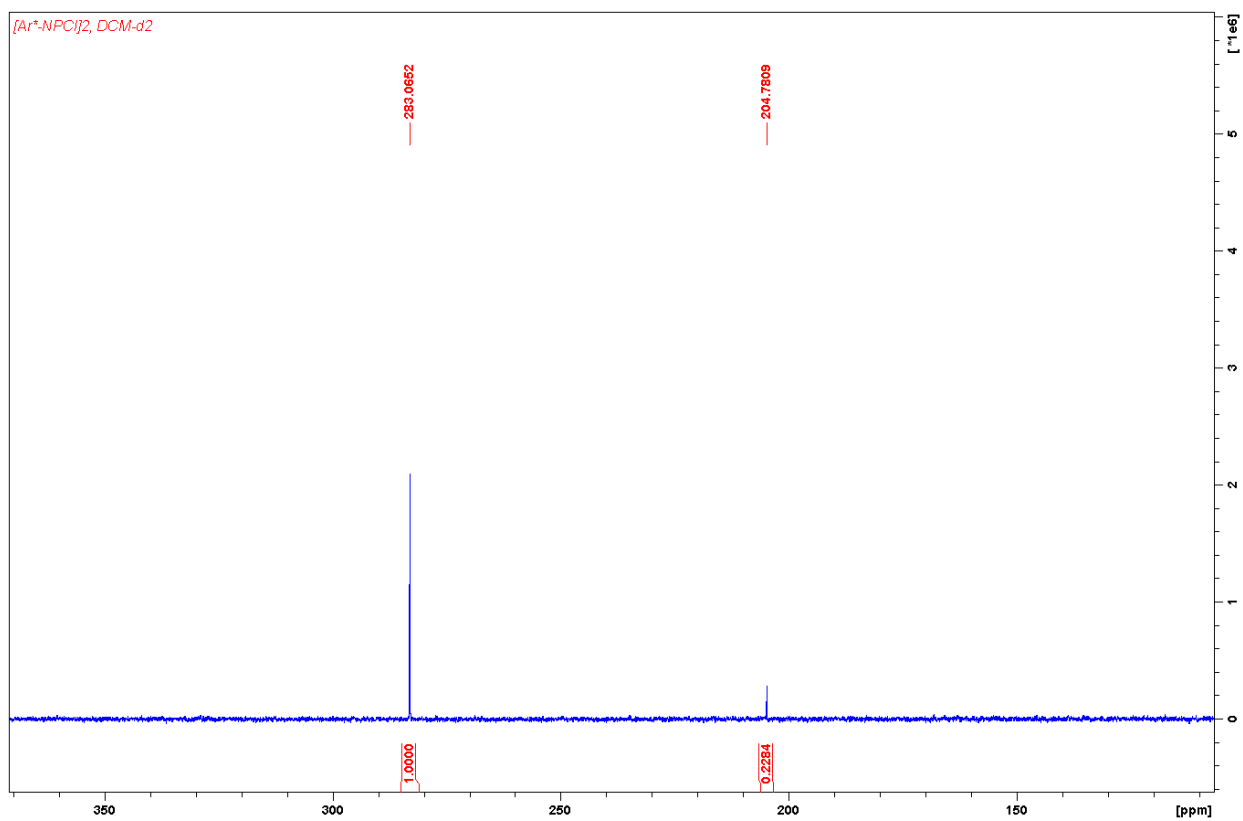

Figure S23.  $^{31}\text{P}$  NMR spectrum of  $[\text{CIP}(\mu\text{-N-Ar}^*)]_2$ .

Spectroscopic characterization of Ar<sup>Bn</sup>-N=PCl (10)

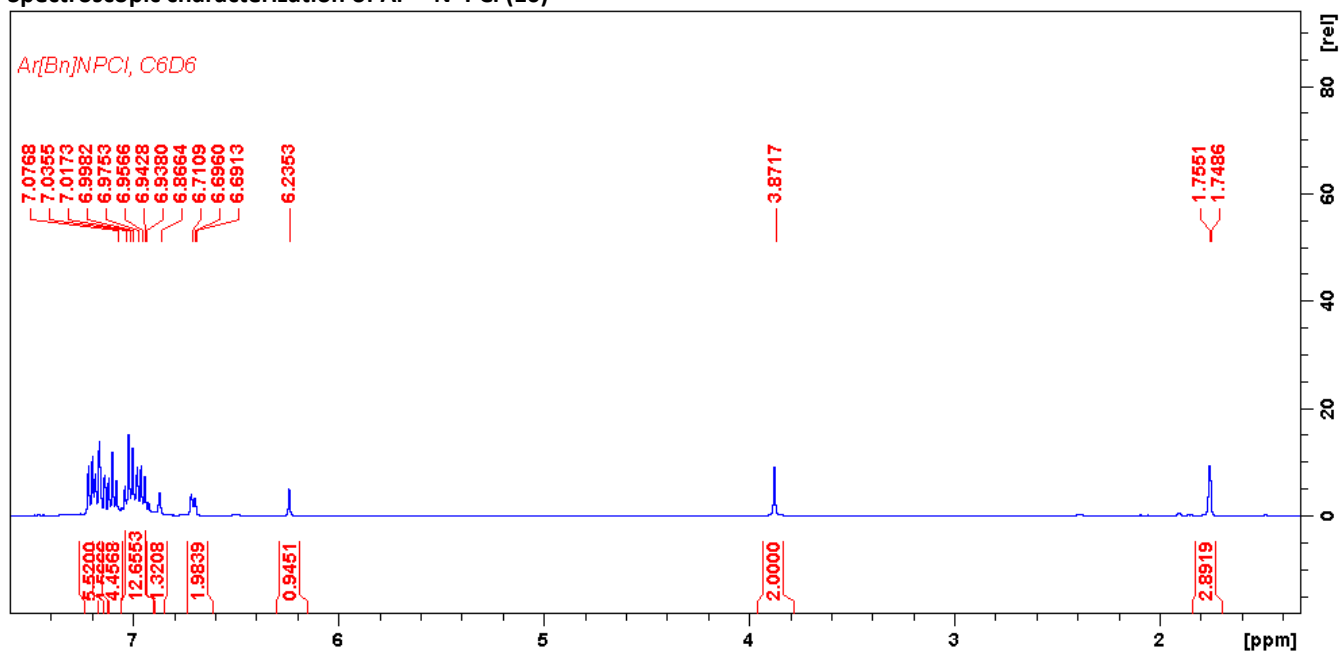

Figure S24. <sup>1</sup>H NMR spectrum of Ar<sup>Bn</sup>-N=PCl.

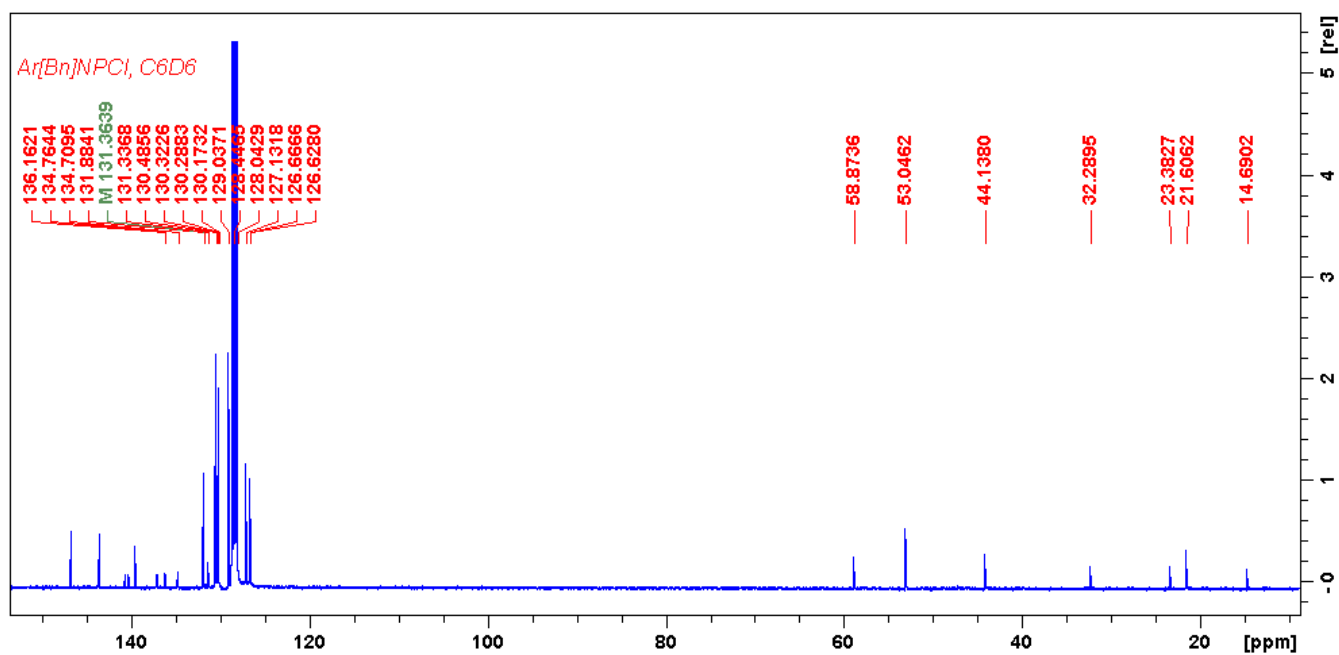

Figure S25. <sup>13</sup>C{<sup>1</sup>H} NMR spectrum of Ar<sup>Bn</sup>-N=PCl.



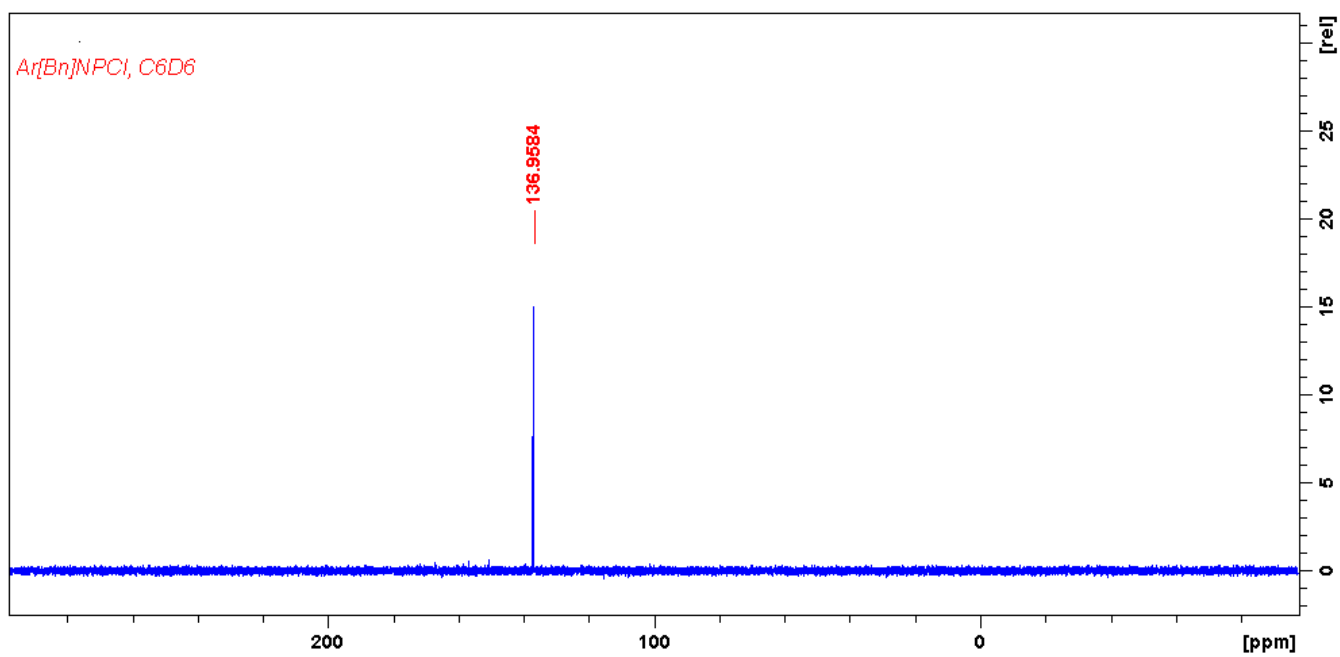

**Figure S26.**  $^{31}\text{P}$  NMR spectrum of  $\text{Ar}^{\text{Bn}}\text{-N=PCl}$ .

**Crystallographic section****Table S1:** Experimental details for **1**

| Crystal data                                                                                                   |                                                                                         |
|----------------------------------------------------------------------------------------------------------------|-----------------------------------------------------------------------------------------|
| Chemical formula                                                                                               | C <sub>39</sub> H <sub>45</sub> NSi <sub>2</sub>                                        |
| <i>M<sub>r</sub></i>                                                                                           | 583.94                                                                                  |
| Crystal system, space group                                                                                    | Triclinic, <i>P</i> -1                                                                  |
| Temperature (K)                                                                                                | 150                                                                                     |
| <i>a</i> , <i>b</i> , <i>c</i> (Å)                                                                             | 9.3294 (5), 10.4494 (6), 18.6129 (10)                                                   |
| $\alpha$ , $\beta$ , $\gamma$ (°)                                                                              | 78.955 (2), 84.572 (2), 69.270 (2)                                                      |
| <i>V</i> (Å <sup>3</sup> )                                                                                     | 1664.89 (16)                                                                            |
| <i>Z</i>                                                                                                       | 2                                                                                       |
| Radiation type                                                                                                 | Cu <i>K</i> α                                                                           |
| $\mu$ (mm <sup>-1</sup> )                                                                                      | 1.16                                                                                    |
| Crystal size (mm)                                                                                              | 0.56 × 0.12 × 0.10                                                                      |
| Data collection                                                                                                |                                                                                         |
| Diffractometer                                                                                                 | Bruker D8 - Venture                                                                     |
| Absorption correction                                                                                          | Multi-scan<br>SADABS2016/2 - Bruker AXS area detector scaling and absorption correction |
| <i>T<sub>min</sub></i> , <i>T<sub>max</sub></i>                                                                | 0.352, 0.754                                                                            |
| No. of measured, independent and observed [ <i>I</i> > 2σ( <i>I</i> )] reflections                             | 18789, 6207, 5223                                                                       |
| <i>R<sub>int</sub></i>                                                                                         | 0.087                                                                                   |
| (sin $\theta/\lambda$ ) <sub>max</sub> (Å <sup>-1</sup> )                                                      | 0.619                                                                                   |
| Refinement                                                                                                     |                                                                                         |
| <i>R</i> [ <i>F</i> <sup>2</sup> > 2σ( <i>F</i> <sup>2</sup> )], <i>wR</i> ( <i>F</i> <sup>2</sup> ), <i>S</i> | 0.134, 0.372, 1.12                                                                      |
| No. of reflections                                                                                             | 6207                                                                                    |
| No. of parameters                                                                                              | 387                                                                                     |
| H-atom treatment                                                                                               | H-atom parameters constrained                                                           |
|                                                                                                                | $w = 1/[\sigma^2(F_o^2) + (0.0437P)^2 + 28.5468P]$<br>where $P = (F_o^2 + 2F_c^2)/3$    |
| $\Delta\rho_{max}$ , $\Delta\rho_{min}$ (e Å <sup>-3</sup> )                                                   | 1.01, -0.55                                                                             |

Computer programs: Bruker Instrument Service vV6.2.3, APEX3 v2016.9-0 (Bruker AXS), SAINT V8.37A (Bruker AXS Inc., 2015), XT, VERSION 2014/5, SHELXL2017/1 (Sheldrick, 2017), Bruker SHELXTL.

**Table S2:** Experimental details for **2**

| Crystal data                                                               |                                                                                         |
|----------------------------------------------------------------------------|-----------------------------------------------------------------------------------------|
| Chemical formula                                                           | C <sub>47</sub> H <sub>41</sub> N                                                       |
| $M_r$                                                                      | 619.81                                                                                  |
| Crystal system, space group                                                | Triclinic, <i>P</i> -1                                                                  |
| Temperature (K)                                                            | 150                                                                                     |
| $a, b, c$ (Å)                                                              | 13.6239 (5), 16.2204 (6), 18.3295 (8)                                                   |
| $\alpha, \beta, \gamma$ (°)                                                | 111.979 (2), 96.405 (2), 104.882 (2)                                                    |
| $V$ (Å <sup>3</sup> )                                                      | 3531.4 (2)                                                                              |
| $Z$                                                                        | 4                                                                                       |
| Radiation type                                                             | Mo $K\alpha$                                                                            |
| $\mu$ (mm <sup>-1</sup> )                                                  | 0.07                                                                                    |
| Crystal size (mm)                                                          | 0.48 × 0.26 × 0.23                                                                      |
| Data collection                                                            |                                                                                         |
| Diffractometer                                                             | Bruker D8 - Venture                                                                     |
| Absorption correction                                                      | Multi-scan<br>SADABS2016/2 - Bruker AXS area detector scaling and absorption correction |
| $T_{\min}, T_{\max}$                                                       | 0.699, 0.746                                                                            |
| No. of measured, independent and observed [ $I > 2\sigma(I)$ ] reflections | 122452, 17644, 11544                                                                    |
| $R_{\text{int}}$                                                           | 0.090                                                                                   |
| $(\sin \theta/\lambda)_{\text{max}}$ (Å <sup>-1</sup> )                    | 0.669                                                                                   |
| Refinement                                                                 |                                                                                         |
| $R[F^2 > 2\sigma(F^2)], wR(F^2), S$                                        | 0.061, 0.145, 1.04                                                                      |
| No. of reflections                                                         | 17644                                                                                   |
| No. of parameters                                                          | 867                                                                                     |
| H-atom treatment                                                           | H-atom parameters constrained                                                           |
| $\Delta\rho_{\text{max}}, \Delta\rho_{\text{min}}$ (e Å <sup>-3</sup> )    | 0.37, -0.36                                                                             |

Computer programs: Bruker Instrument Service vV6.2.3, APEX3 v2016.9-0 (Bruker AXS), SAINT V8.37A (Bruker AXS Inc., 2015), XT, VERSION 2014/5, SHELXL2017/1 (Sheldrick, 2017), Bruker SHELXTL.

**Table S3:** Experimental details for **3**

| Crystal data                                                               |                                                                                         |
|----------------------------------------------------------------------------|-----------------------------------------------------------------------------------------|
| Chemical formula                                                           | C <sub>34</sub> H <sub>27</sub> NO                                                      |
| $M_r$                                                                      | 465.56                                                                                  |
| Crystal system, space group                                                | Triclinic, <i>P</i> -1                                                                  |
| Temperature (K)                                                            | 150                                                                                     |
| $a, b, c$ (Å)                                                              | 5.4624 (11), 13.410 (3), 17.986 (4)                                                     |
| $\alpha, \beta, \gamma$ (°)                                                | 102.708 (11), 97.662 (12), 98.134 (11)                                                  |
| $V$ (Å <sup>3</sup> )                                                      | 1253.6 (5)                                                                              |
| $Z$                                                                        | 2                                                                                       |
| Radiation type                                                             | Mo $K\alpha$                                                                            |
| $\mu$ (mm <sup>-1</sup> )                                                  | 0.07                                                                                    |
| Crystal size (mm)                                                          | 0.21 × 0.19 × 0.11                                                                      |
| Data collection                                                            |                                                                                         |
| Diffractometer                                                             | Bruker D8 - Venture                                                                     |
| Absorption correction                                                      | Multi-scan<br>SADABS2016/2 - Bruker AXS area detector scaling and absorption correction |
| $T_{\min}, T_{\max}$                                                       | 0.559, 0.745                                                                            |
| No. of measured, independent and observed [ $I > 2\sigma(I)$ ] reflections | 18008, 4859, 3271                                                                       |
| $R_{\text{int}}$                                                           | 0.110                                                                                   |
| $(\sin \theta/\lambda)_{\text{max}}$ (Å <sup>-1</sup> )                    | 0.617                                                                                   |
| Refinement                                                                 |                                                                                         |
| $R[F^2 > 2\sigma(F^2)], wR(F^2), S$                                        | 0.109, 0.295, 1.05                                                                      |
| No. of reflections                                                         | 4859                                                                                    |
| No. of parameters                                                          | 327                                                                                     |
| H-atom treatment                                                           | H-atom parameters constrained                                                           |
| $\Delta\rho_{\text{max}}, \Delta\rho_{\text{min}}$ (e Å <sup>-3</sup> )    | 0.47, -0.37                                                                             |

Computer programs: Bruker Instrument Service vV6.2.3, APEX3 v2016.9-0 (Bruker AXS), SAINT V8.37A (Bruker AXS Inc., 2015), XT, VERSION 2014/5, SHELXL2017/1 (Sheldrick, 2017), Bruker SHELXTL.

**Table S4:** Experimental details for **4**

| Crystal data                                                               |                                                                                         |
|----------------------------------------------------------------------------|-----------------------------------------------------------------------------------------|
| Chemical formula                                                           | C <sub>41</sub> H <sub>31</sub> NO <sub>2</sub>                                         |
| $M_r$                                                                      | 569.67                                                                                  |
| Crystal system, space group                                                | Monoclinic, $P2_1/c$                                                                    |
| Temperature (K)                                                            | 150                                                                                     |
| $a, b, c$ (Å)                                                              | 12.1041 (5), 16.6818 (5), 15.3349 (5)                                                   |
| $\beta$ (°)                                                                | 91.605 (1)                                                                              |
| $V$ (Å <sup>3</sup> )                                                      | 3095.18 (19)                                                                            |
| $Z$                                                                        | 4                                                                                       |
| Radiation type                                                             | Mo $K\alpha$                                                                            |
| $\mu$ (mm <sup>-1</sup> )                                                  | 0.07                                                                                    |
| Crystal size (mm)                                                          | 0.59 × 0.29 × 0.24                                                                      |
| Data collection                                                            |                                                                                         |
| Diffractometer                                                             | Bruker D8 - Venture                                                                     |
| Absorption correction                                                      | Multi-scan<br>SADABS2016/2 - Bruker AXS area detector scaling and absorption correction |
| $T_{\min}, T_{\max}$                                                       | 0.696, 0.746                                                                            |
| No. of measured, independent and observed [ $I > 2\sigma(I)$ ] reflections | 74613, 7574, 5581                                                                       |
| $R_{\text{int}}$                                                           | 0.074                                                                                   |
| $(\sin \theta/\lambda)_{\text{max}}$ (Å <sup>-1</sup> )                    | 0.664                                                                                   |
| Refinement                                                                 |                                                                                         |
| $R[F^2 > 2\sigma(F^2)], wR(F^2), S$                                        | 0.050, 0.123, 1.04                                                                      |
| No. of reflections                                                         | 7574                                                                                    |
| No. of parameters                                                          | 398                                                                                     |
| H-atom treatment                                                           | H-atom parameters constrained                                                           |
| $\Delta\rho_{\text{max}}, \Delta\rho_{\text{min}}$ (e Å <sup>-3</sup> )    | 0.31, -0.23                                                                             |

Computer programs: Bruker Instrument Service vV6.2.3, APEX3 v2016.9-0 (Bruker AXS), SAINT V8.37A (Bruker AXS Inc., 2015), XT, VERSION 2014/5, SHELXL2017/1 (Sheldrick, 2017), Bruker SHELXTL.

**Table S5:** Experimental details for **5**

| Crystal data                                                               |                                          |
|----------------------------------------------------------------------------|------------------------------------------|
| Chemical formula                                                           | C <sub>40</sub> H <sub>33</sub> N        |
| $M_r$                                                                      | 527.67                                   |
| Crystal system, space group                                                | Monoclinic, $P2_1/n$                     |
| Temperature (K)                                                            | 150                                      |
| $a, b, c$ (Å)                                                              | 12.7282 (11), 16.8510 (12), 13.9530 (11) |
| $\beta$ (°)                                                                | 98.367 (3)                               |
| $V$ (Å <sup>3</sup> )                                                      | 2960.8 (4)                               |
| $Z$                                                                        | 4                                        |
| Radiation type                                                             | Mo $K\alpha$                             |
| $\mu$ (mm <sup>-1</sup> )                                                  | 0.07                                     |
| Crystal size (mm)                                                          | 0.55 × 0.55 × 0.33                       |
| Data collection                                                            |                                          |
| Diffractometer                                                             | Bruker D8 - Venture                      |
| Absorption correction                                                      | Multi-scan                               |
| $T_{\min}, T_{\max}$                                                       | 0.671, 0.746                             |
| No. of measured, independent and observed [ $I > 2\sigma(I)$ ] reflections | 65778, 8205, 5672                        |
| $R_{\text{int}}$                                                           | 0.102                                    |
| $(\sin \theta/\lambda)_{\text{max}}$ (Å <sup>-1</sup> )                    | 0.694                                    |
| Refinement                                                                 |                                          |
| $R[F^2 > 2\sigma(F^2)], wR(F^2), S$                                        | 0.072, 0.139, 1.08                       |
| No. of reflections                                                         | 8205                                     |
| No. of parameters                                                          | 371                                      |
| H-atom treatment                                                           | H-atom parameters constrained            |
| $\Delta\rho_{\text{max}}, \Delta\rho_{\text{min}}$ (e Å <sup>-3</sup> )    | 0.28, -0.29                              |

Computer programs: Bruker Instrument Service vV6.2.3, APEX3 v2016.9-0 (Bruker AXS), SAINT V8.37A (Bruker AXS Inc., 2015), XT, VERSION 2014/5, SHELXL2017/1 (Sheldrick, 2017), Bruker SHELXTL.

**Table S6:** Experimental details for **6**

| Crystal data                                                               |                                                                                         |
|----------------------------------------------------------------------------|-----------------------------------------------------------------------------------------|
| Chemical formula                                                           | C <sub>41</sub> H <sub>35</sub> N                                                       |
| $M_r$                                                                      | 541.70                                                                                  |
| Crystal system, space group                                                | Monoclinic, $P2_1/n$                                                                    |
| Temperature (K)                                                            | 150                                                                                     |
| $a, b, c$ (Å)                                                              | 12.889 (3), 16.963 (4), 13.963 (4)                                                      |
| $\beta$ (°)                                                                | 98.517 (9)                                                                              |
| $V$ (Å <sup>3</sup> )                                                      | 3019.3 (14)                                                                             |
| $Z$                                                                        | 4                                                                                       |
| Radiation type                                                             | Mo $K\alpha$                                                                            |
| $\mu$ (mm <sup>-1</sup> )                                                  | 0.07                                                                                    |
| Crystal size (mm)                                                          | 0.31 × 0.16 × 0.10                                                                      |
| Data collection                                                            |                                                                                         |
| Diffractometer                                                             | Bruker D8 - Venture                                                                     |
| Absorption correction                                                      | Multi-scan<br>SADABS2016/2 - Bruker AXS area detector scaling and absorption correction |
| $T_{\min}, T_{\max}$                                                       | 0.690, 0.746                                                                            |
| No. of measured, independent and observed [ $I > 2\sigma(I)$ ] reflections | 46616, 6975, 4208                                                                       |
| $R_{\text{int}}$                                                           | 0.135                                                                                   |
| $(\sin \theta/\lambda)_{\text{max}}$ (Å <sup>-1</sup> )                    | 0.651                                                                                   |
| Refinement                                                                 |                                                                                         |
| $R[F^2 > 2\sigma(F^2)], wR(F^2), S$                                        | 0.059, 0.129, 1.04                                                                      |
| No. of reflections                                                         | 6975                                                                                    |
| No. of parameters                                                          | 381                                                                                     |
| H-atom treatment                                                           | H-atom parameters constrained                                                           |
| $\Delta\rho_{\text{max}}, \Delta\rho_{\text{min}}$ (e Å <sup>-3</sup> )    | 0.22, -0.27                                                                             |

Computer programs: Bruker Instrument Service vV6.2.3, APEX3 v2016.9-0 (Bruker AXS), SAINT V8.37A (Bruker AXS Inc., 2015), XT, VERSION 2014/5, SHELXL2017/1 (Sheldrick, 2017), Bruker SHELXTL.

**Table S7:** Experimental details for **7**

| Crystal data                                                               |                                                                                         |
|----------------------------------------------------------------------------|-----------------------------------------------------------------------------------------|
| Chemical formula                                                           | C <sub>51</sub> H <sub>49</sub> N·0.5(C <sub>7</sub> H <sub>8</sub> )                   |
| $M_r$                                                                      | 721.98                                                                                  |
| Crystal system, space group                                                | Triclinic, <i>P</i> -1                                                                  |
| Temperature (K)                                                            | 150                                                                                     |
| $a, b, c$ (Å)                                                              | 13.6590 (9), 14.2712 (8), 21.5396 (14)                                                  |
| $\alpha, \beta, \gamma$ (°)                                                | 88.277 (2), 79.673 (2), 85.386 (2)                                                      |
| $V$ (Å <sup>3</sup> )                                                      | 4116.8 (4)                                                                              |
| $Z$                                                                        | 4                                                                                       |
| Radiation type                                                             | Mo $K\alpha$                                                                            |
| $\mu$ (mm <sup>-1</sup> )                                                  | 0.07                                                                                    |
| Crystal size (mm)                                                          | 0.50 × 0.15 × 0.12                                                                      |
| Data collection                                                            |                                                                                         |
| Diffractometer                                                             | Bruker D8 - Venture                                                                     |
| Absorption correction                                                      | Multi-scan<br>SADABS2016/2 - Bruker AXS area detector scaling and absorption correction |
| $T_{\min}, T_{\max}$                                                       | 0.668, 0.745                                                                            |
| No. of measured, independent and observed [ $I > 2\sigma(I)$ ] reflections | 79331, 16064, 11189                                                                     |
| $R_{\text{int}}$                                                           | 0.079                                                                                   |
| $(\sin \theta/\lambda)_{\text{max}}$ (Å <sup>-1</sup> )                    | 0.616                                                                                   |
| Refinement                                                                 |                                                                                         |
| $R[F^2 > 2\sigma(F^2)], wR(F^2), S$                                        | 0.056, 0.150, 1.01                                                                      |
| No. of reflections                                                         | 16064                                                                                   |
| No. of parameters                                                          | 1013                                                                                    |
| No. of restraints                                                          | 12                                                                                      |
| H-atom treatment                                                           | H atoms treated by a mixture of independent and constrained refinement                  |
| $\Delta\rho_{\text{max}}, \Delta\rho_{\text{min}}$ (e Å <sup>-3</sup> )    | 0.38, -0.28                                                                             |

Computer programs: Bruker Instrument Service vV6.2.3, APEX3 v2016.9-0 (Bruker AXS), SAINT V8.37A (Bruker AXS Inc., 2015), XT, VERSION 2014/5, SHELXL2017/1 (Sheldrick, 2017), Bruker SHELXTL.



**Table S8:** Experimental details for **8**

| Crystal data                                                               |                                                                                         |
|----------------------------------------------------------------------------|-----------------------------------------------------------------------------------------|
| Chemical formula                                                           | C <sub>40</sub> H <sub>35</sub> N                                                       |
| $M_r$                                                                      | 529.69                                                                                  |
| Crystal system, space group                                                | Triclinic, <i>P</i> -1                                                                  |
| Temperature (K)                                                            | 150                                                                                     |
| $a, b, c$ (Å)                                                              | 10.9439 (10), 11.4579 (10), 12.4427 (11)                                                |
| $\alpha, \beta, \gamma$ (°)                                                | 73.734 (3), 75.085 (3), 77.426 (3)                                                      |
| $V$ (Å <sup>3</sup> )                                                      | 1429.4 (2)                                                                              |
| $Z$                                                                        | 2                                                                                       |
| Radiation type                                                             | Mo $K\alpha$                                                                            |
| $\mu$ (mm <sup>-1</sup> )                                                  | 0.07                                                                                    |
| Crystal size (mm)                                                          | 0.41 × 0.15 × 0.14                                                                      |
| Data collection                                                            |                                                                                         |
| Diffractometer                                                             | Bruker D8 - Venture                                                                     |
| Absorption correction                                                      | Multi-scan<br>SADABS2016/2 - Bruker AXS area detector scaling and absorption correction |
| $T_{\min}, T_{\max}$                                                       | 0.494, 0.958                                                                            |
| No. of measured, independent and observed [ $I > 2\sigma(I)$ ] reflections | 11417, 4199, 3297                                                                       |
| $R_{\text{int}}$                                                           | 0.084                                                                                   |
| $(\sin \theta/\lambda)_{\text{max}}$ (Å <sup>-1</sup> )                    | 0.594                                                                                   |
| Refinement                                                                 |                                                                                         |
| $R[F^2 > 2\sigma(F^2)], wR(F^2), S$                                        | 0.119, 0.302, 1.12                                                                      |
| No. of reflections                                                         | 4199                                                                                    |
| No. of parameters                                                          | 371                                                                                     |
| No. of restraints                                                          | 349                                                                                     |
| H-atom treatment                                                           | H-atom parameters constrained                                                           |
| $\Delta\rho_{\text{max}}, \Delta\rho_{\text{min}}$ (e Å <sup>-3</sup> )    | 0.56, -0.57                                                                             |

Computer programs: Bruker Instrument Service vV6.2.3, APEX3 v2016.9-0 (Bruker AXS), SAINT V8.37A (Bruker AXS Inc., 2015), XT, VERSION 2014/5, SHELXL2017/1 (Sheldrick, 2017), Bruker SHELXTL.

**Table S9:** Experimental details for **10**

| Crystal data                                                               |                                                                                         |
|----------------------------------------------------------------------------|-----------------------------------------------------------------------------------------|
| Chemical formula                                                           | C <sub>40</sub> H <sub>33</sub> ClNP                                                    |
| $M_r$                                                                      | 594.09                                                                                  |
| Crystal system, space group                                                | Monoclinic, $P2_1/n$                                                                    |
| Temperature (K)                                                            | 150                                                                                     |
| $a, b, c$ (Å)                                                              | 8.622 (2), 19.654 (2), 18.335 (2)                                                       |
| $\beta$ (°)                                                                | 94.724 (9)                                                                              |
| $V$ (Å <sup>3</sup> )                                                      | 3096.5 (10)                                                                             |
| $Z$                                                                        | 4                                                                                       |
| Radiation type                                                             | Mo $K\alpha$                                                                            |
| $\mu$ (mm <sup>-1</sup> )                                                  | 0.21                                                                                    |
| Crystal size (mm)                                                          | 0.41 × 0.18 × 0.07                                                                      |
| Data collection                                                            |                                                                                         |
| Diffractometer                                                             | Bruker D8 - Venture                                                                     |
| Absorption correction                                                      | Multi-scan<br>SADABS2016/2 - Bruker AXS area detector scaling and absorption correction |
| $T_{\min}, T_{\max}$                                                       | 0.645, 0.746                                                                            |
| No. of measured, independent and observed [ $I > 2\sigma(I)$ ] reflections | 72188, 7109, 4960                                                                       |
| $R_{\text{int}}$                                                           | 0.117                                                                                   |
| $(\sin \theta/\lambda)_{\text{max}}$ (Å <sup>-1</sup> )                    | 0.651                                                                                   |
| Refinement                                                                 |                                                                                         |
| $R[F^2 > 2\sigma(F^2)], wR(F^2), S$                                        | 0.062, 0.151, 1.07                                                                      |
| No. of reflections                                                         | 7109                                                                                    |
| No. of parameters                                                          | 389                                                                                     |
| No. of restraints                                                          | 342                                                                                     |
| H-atom treatment                                                           | H-atom parameters constrained                                                           |
| $\Delta\rho_{\text{max}}, \Delta\rho_{\text{min}}$ (e Å <sup>-3</sup> )    | 0.38, -0.54                                                                             |

Computer programs: Bruker Instrument Service vV6.2.3, APEX3 v2016.9-0 (Bruker AXS), SAINT V8.37A (Bruker AXS Inc., 2015), XT, VERSION 2014/5, SHELXL2017/1 (Sheldrick, 2017), Bruker SHELXTL.

## Quantum-Chemical Section

Buried Volume was calculated by SambVca with default parameters, nitrogen atom was chosen as the centre of the sphere with radii = 3.5 Å (all anilines except Ar<sup>Bn</sup>NH<sub>2</sub> (**8**) were calculated by us previously<sup>S1</sup> and are added here for comparison) and 6.0 Å.<sup>S2-5</sup> Spatial orientation of the anilines is depicted in figure S32.

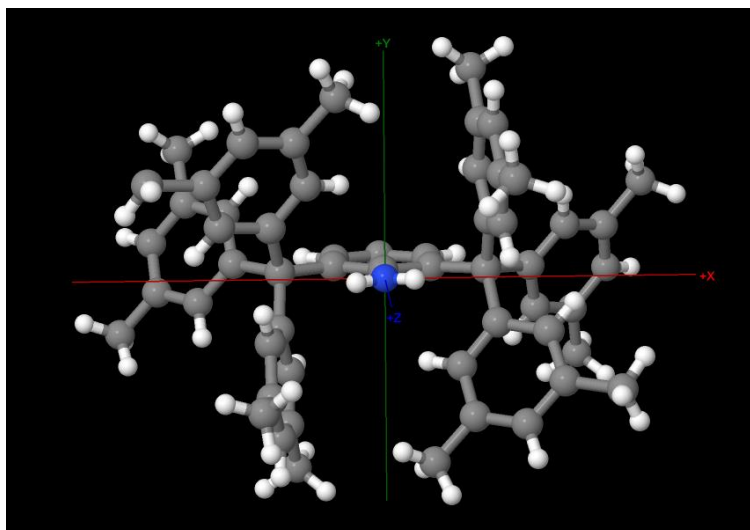

Figure S27. Spatial orientation of the bulky anilines chosen for the calculation of the buried volume.

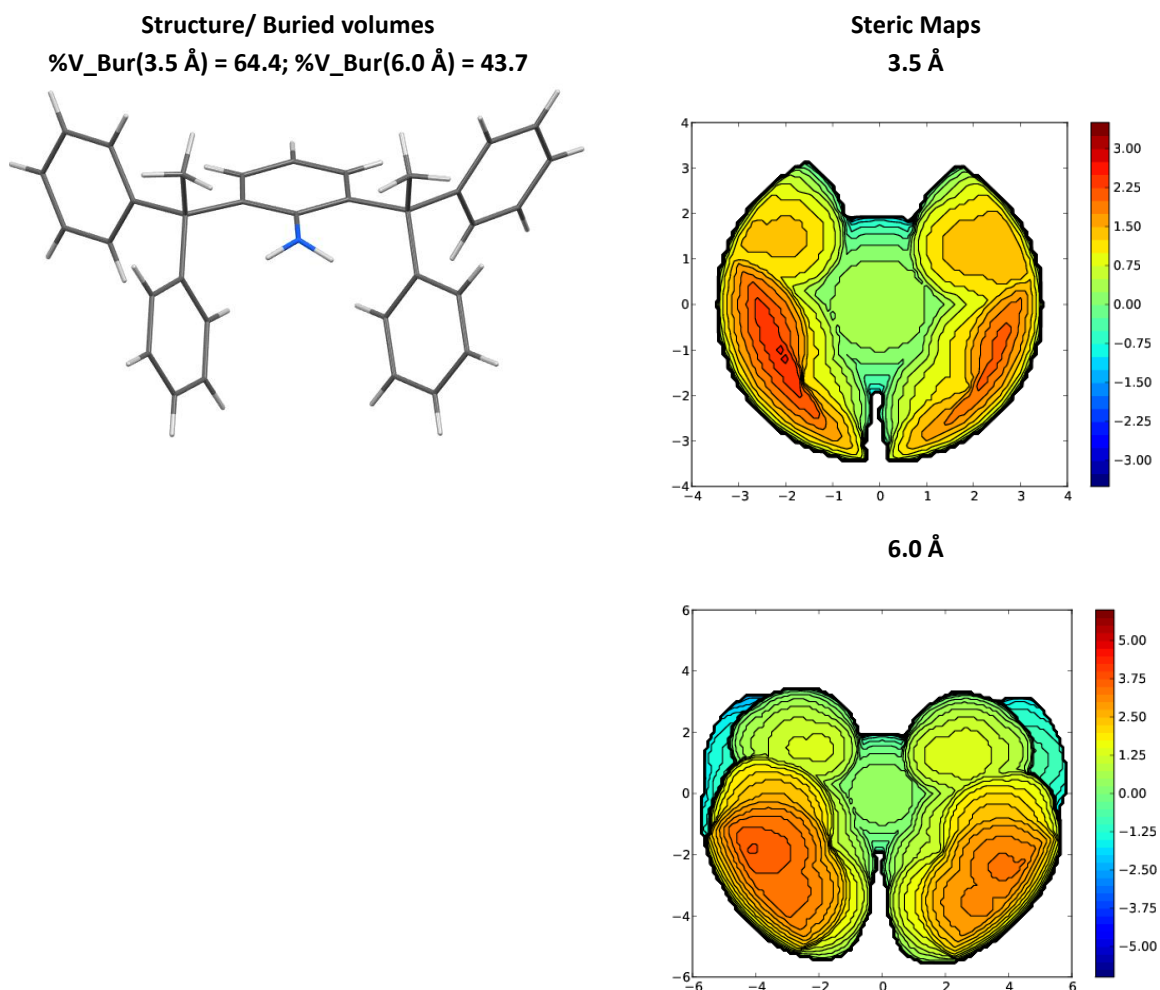

$\%V_{\text{Bur}}(3.5 \text{ \AA}) = 62.6$ ;  $\%V_{\text{Bur}}(6.0 \text{ \AA}) = 46.1$

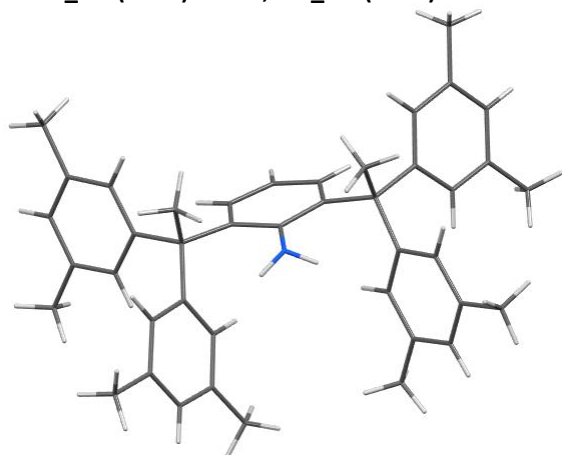

3.5 Å

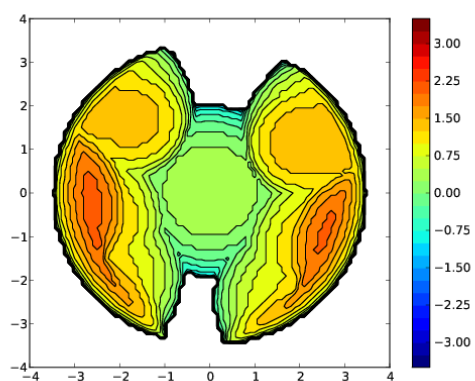

6.0 Å

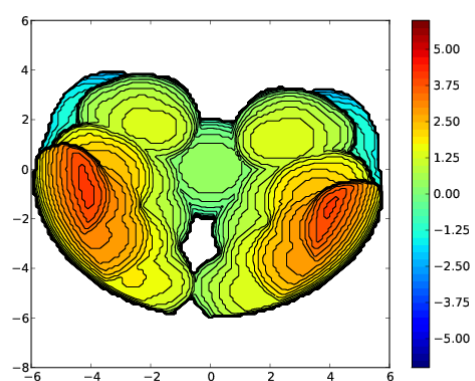

$\%V_{\text{Bur}}(3.5 \text{ \AA}) = 51.7$ ;  $\%V_{\text{Bur}}(6.0 \text{ \AA}) = 39.7$

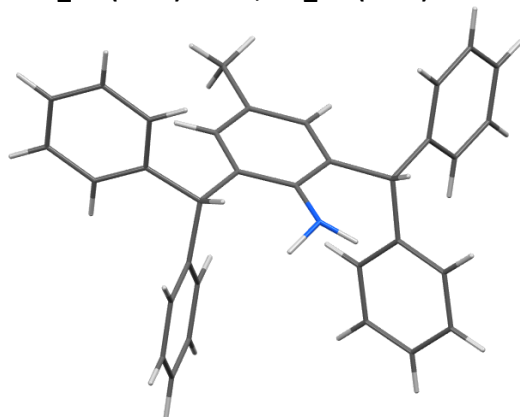

3.5 Å

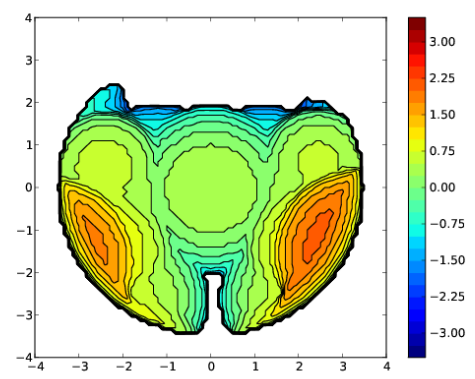

6.0 Å

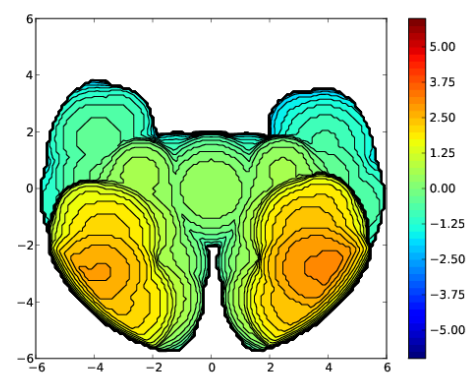

$\%V_{\text{Bur}}(3.5 \text{ \AA}) = 52.8; \%V_{\text{Bur}}(6.0 \text{ \AA}) = 36.3$

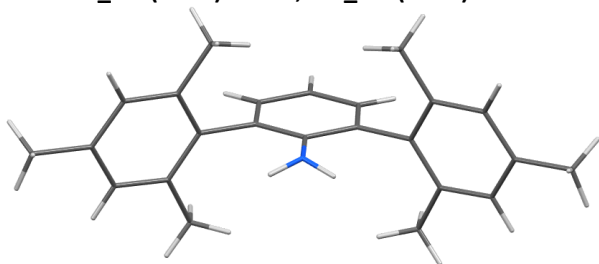

3.5 Å

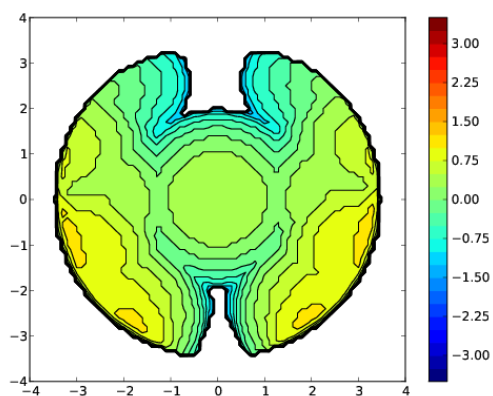

6.0 Å

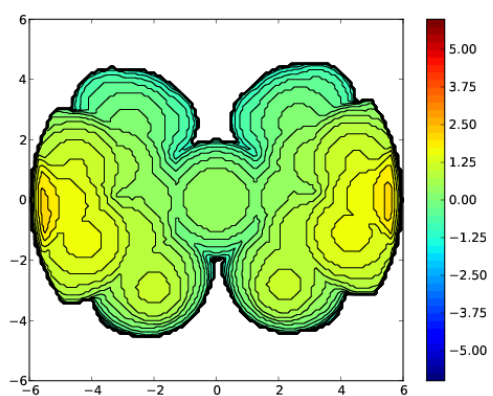

$\%V_{\text{Bur}}(3.5 \text{ \AA}) = 54.9; \%V_{\text{Bur}}(6.0 \text{ \AA}) = 28.5$

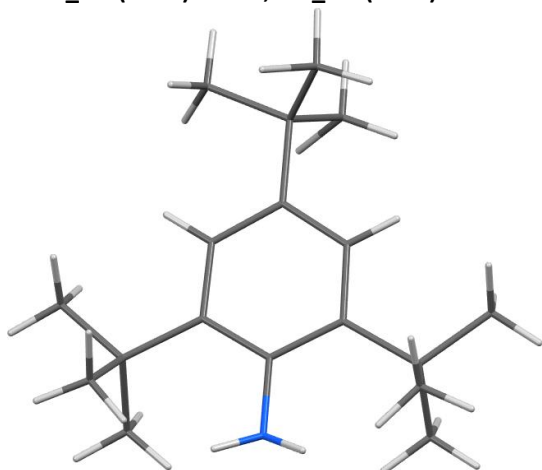

3.5 Å

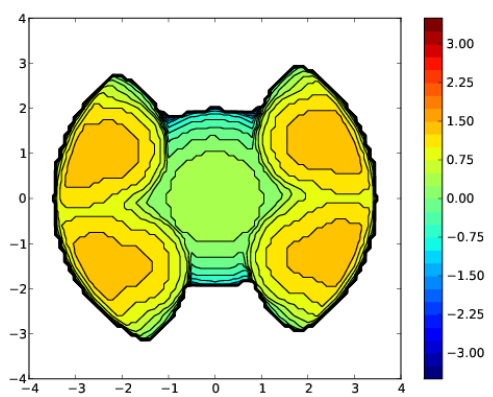

6.0 Å

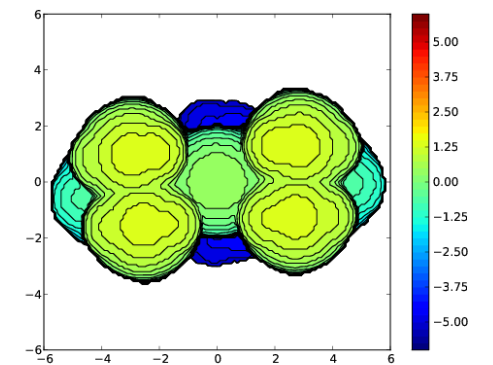

$\%V_{\text{Bur}}(3.5 \text{ \AA}) = 60.0$ ;  $\%V_{\text{Bur}}(6.0 \text{ \AA}) = 46.9$

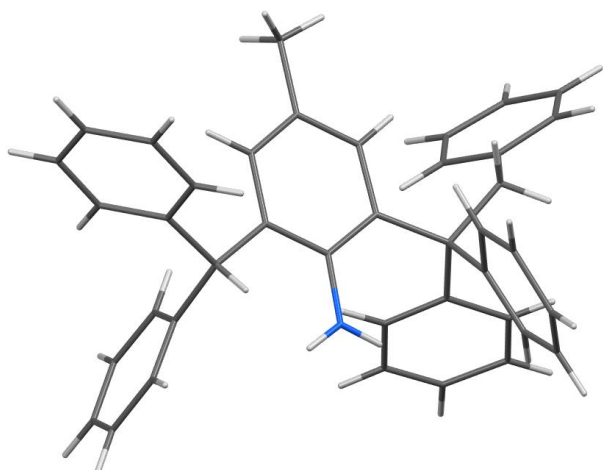

3.5 Å

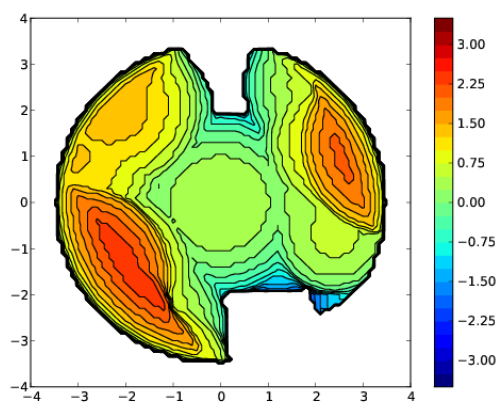

6.0 Å

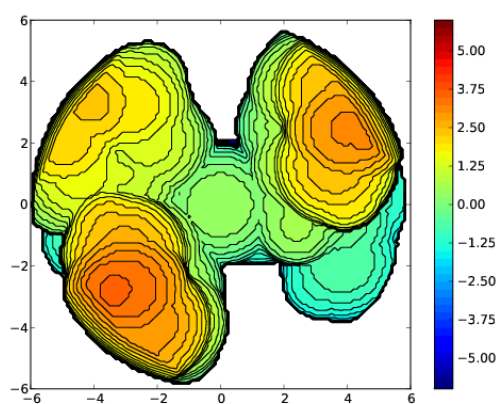

## References

- [S1] J. Vrána, M. A. Samsonov, V. Němec and A. Růžička, *Chem. Commun.*, 2020, **56**, 2487–2490.
- [S2] A. Poater, B. Cosenza, A. Correa, S. Giudice, F. Ragone, L. Cavallo and V. Scarano, *Eur. J. Inorg. Chem.*, 2009, 1759–1766.
- [S3] A. Poater, F. Ragone, S. Giudice, C. Costabile, R. Dorta, S. P. Nolan and L. Cavallo *Organometallics* 2008, **27**, 2679– 2681.
- [S4] A. Poater, F. Ragone, R. Mariz, R. Dorta and L. Cavallo, *Chem. Eur. J.*, 2010, **16**, 14348–14353.
- [S5] (a) R. J. Wright, J. Steiner, S. Beaini and P. P. Power, *Inorg. Chim. Acta*, 2006, **359**, 1939–1946; (b) E. Pohl, R. Herbst-Irmer, K. Köhler, H. W. Roesky and G. M. Sheldrick, *Acta Cryst. Sect. C*, 1993, **49**, 2141–2143; (c) D. Dange, S. L. Choong, C. Schenk, A. Stasch and C. Jones, *Dalton Trans.* 2012, **41**, 9304–9315.
